# Supplementary material for: Patient and informal carer experience of hip fracture: a qualitative study using interviews and observation in acute orthopaedic trauma
Source: PubMed Central journal article supplement — BMJ Open. 2021 Feb 4;11(2):e042040. doi: 10.1136/bmjopen-2020-042040 (PMC7925874; doi:10.1136/bmjopen-2020-042040), 2021-02-04
Supplement: bmjopen-2020-042040.draft_revisions.pdf [file bmjopen-2020-042040.draft_revisions.pdf]

# BMJ Open

BMJ Open is committed to open peer review. As part of this commitment we make the peer review history of every article we publish publicly available.

When an article is published we post the peer reviewers' comments and the authors' responses online. We also post the versions of the paper that were used during peer review. These are the versions that the peer review comments apply to.

The versions of the paper that follow are the versions that were submitted during the peer review process. They are not the versions of record or the final published versions. They should not be cited or distributed as the published version of this manuscript.

BMJ Open is an open access journal and the full, final, typeset and author-corrected version of record of the manuscript is available on our site with no access controls, subscription charges or pay-per-view fees (<http://bmjopen.bmj.com>).

If you have any questions on BMJ Open's open peer review process please email [info.bmjopen@bmj.com](mailto:info.bmjopen@bmj.com)

# BMJ Open

## Patient and informal carer experience of hip fracture: A qualitative study using interviews and observation in acute orthopaedic trauma

|                               |                                                                                                                                                                                                                                                                                                                                                                                                                                                                                             |
|-------------------------------|---------------------------------------------------------------------------------------------------------------------------------------------------------------------------------------------------------------------------------------------------------------------------------------------------------------------------------------------------------------------------------------------------------------------------------------------------------------------------------------------|
| Journal:                      | <i>BMJ Open</i>                                                                                                                                                                                                                                                                                                                                                                                                                                                                             |
| Manuscript ID                 | bmjopen-2020-042040                                                                                                                                                                                                                                                                                                                                                                                                                                                                         |
| Article Type:                 | Original research                                                                                                                                                                                                                                                                                                                                                                                                                                                                           |
| Date Submitted by the Author: | 23-Jun-2020                                                                                                                                                                                                                                                                                                                                                                                                                                                                                 |
| Complete List of Authors:     | Tutton, Elizabeth; University of Oxford, NDORMS<br>Saletti-Cuesta, Lorena; Culture and Society Research and Study Centre, National Scientific and Technical Research Council (CIECS-CONICET-UNC)<br>Langstaff, Debbie; Oxford University Hospitals NHS Foundation Trust<br>Wright, Julie; Oxford University Hospitals NHS Foundation Trust<br>Willett, Keith; Kadoorie Research Centre, Nuffield Department of Orthopaedics, Rheumatology and Musculoskeletal Science, University of Oxford |
| Keywords:                     | Orthopaedic & trauma surgery < SURGERY, Hip < ORTHOPAEDIC & TRAUMA SURGERY, Quality in health care < HEALTH SERVICES ADMINISTRATION & MANAGEMENT                                                                                                                                                                                                                                                                                                                                            |
|                               |                                                                                                                                                                                                                                                                                                                                                                                                                                                                                             |

SCHOLARONE™  
Manuscripts

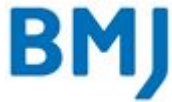

I, the Submitting Author has the right to grant and does grant on behalf of all authors of the Work (as defined in the below author licence), an exclusive licence and/or a non-exclusive licence for contributions from authors who are: i) UK Crown employees; ii) where BMJ has agreed a CC-BY licence shall apply, and/or iii) in accordance with the terms applicable for US Federal Government officers or employees acting as part of their official duties; on a worldwide, perpetual, irrevocable, royalty-free basis to BMJ Publishing Group Ltd ("BMJ") its licensees and where the relevant Journal is co-owned by BMJ to the co-owners of the Journal, to publish the Work in this journal and any other BMJ products and to exploit all rights, as set out in our [licence](#).

The Submitting Author accepts and understands that any supply made under these terms is made by BMJ to the Submitting Author unless you are acting as an employee on behalf of your employer or a postgraduate student of an affiliated institution which is paying any applicable article publishing charge ("APC") for Open Access articles. Where the Submitting Author wishes to make the Work available on an Open Access basis (and intends to pay the relevant APC), the terms of reuse of such Open Access shall be governed by a Creative Commons licence – details of these licences and which [Creative Commons](#) licence will apply to this Work are set out in our licence referred to above.

Other than as permitted in any relevant BMJ Author's Self Archiving Policies, I confirm this Work has not been accepted for publication elsewhere, is not being considered for publication elsewhere and does not duplicate material already published. I confirm all authors consent to publication of this Work and authorise the granting of this licence.

Short title: Experience of hip fracture

**Patient and informal carer experience of hip fracture: A qualitative study using interviews and observation in acute orthopaedic trauma**

**\*Elizabeth Tutton<sup>1,3</sup>, Lorena Saletti-Cuesta<sup>2</sup>, Debbie Langstaff<sup>3</sup>, Julie Wright<sup>3</sup>, Keith Willett<sup>1</sup>**

*<sup>1</sup>Oxford Trauma and Emergency Care, Kadoorie Centre, Nuffield Department of Orthopaedics, Rheumatology and Musculoskeletal Sciences, University of Oxford*

*<sup>2</sup>Culture and Society Research and Study Centre, National Scientific and Technical Research Council (CIECS-CONICET-UNC), Cordoba, Argentina*

*<sup>3</sup>Oxford University Hospitals NHS Foundation Trust, John Radcliffe Hospital, OX3 9DU, UK*

**Email addresses:** \*liz.tutton@ndorms.ox.ac.uk, lorenasaletti@unc.edu.ar,

debbie.langstaff@ouh.nhs.uk, julie.wright@ouh.nhs.uk, keith.willett@ndorms.ox.ac.uk

**\*CORRESPONDING AUTHOR**

Elizabeth Tutton

liz.tutton@ndorms.ox.ac.uk

Tel: 01865 223106

**Kadoorie Centre**

**Level 3, John Radcliffe Hospital**

**Oxford OX3 9DU**

**Word Count: 3,999**

**Keywords:** injury, recovery, hip fracture, experience, qualitative, patients, informal carers

Short title: Experience of hip fracture

1  
2  
3 **ABSTRACT**  
4  
5  
6  
7

8 **Objectives:** The time taken for older people to recover from hip fracture can be extensive. The aim  
9  
10 of this study was to gain an understanding of patient and informal carer experience of recovery in  
11  
12 the early stage, whilst in acute care.  
13

14  
15  
16 **Design:** A phenomenological (lived experience) approach was used to guide the design of the study.  
17  
18 Interviews and observation took place between March 2016 and December 2016 in acute care.  
19  
20  
21

22  
23 **Setting:** Trauma wards in an NHS Foundation Trust in the South West of England.  
24  
25  
26

27  
28 **Participants:** A purposive sample of 25 patients were interviewed and observation taking 52 hours  
29  
30 was undertaken with 13 patients and 12 staff. 11 patients had memory loss, two patients chose to  
31  
32 take part in an interview and observation. The age range was 63-91 years (median 83), 10 were  
33  
34 male. A purposive sample of 25 informal carers were also interviewed, the age range was 42-95  
35  
36 (mean 64), 11 were male.  
37  
38  
39

40  
41 **Results:** The results identified how participants moved forward together after injury by sharing the  
42  
43 journey. This was conveyed through three themes: i) sustaining relationships whilst experiencing  
44  
45 strong emotions and actively helping, ii) becoming aware of uncertainty about the future and  
46  
47 working through possible outcomes, iii) being changed, visibly looking different, not being able to  
48  
49 walk and enduring indignity and pain.  
50  
51

52  
53  
54 **Conclusion:** This study identified the work undertaken by patients and informal carers to share the  
55  
56 journey during a challenging life transition. This work may not always be visible to others.  
57  
58 Supportive, family/friend centred strategies that enable successful negotiation of the emotional and  
59  
60

1 Short title: Experience of hip fracture  
2

3 practical challenges of hip fracture recovery in acute care, are required. Research should focus on  
4  
5 developing interventions that enable older people and informal carers to live fulfilled lives.  
6  
7  
8  
9

## 10 **ARTICLE SUMMARY**

### 11 **Strengths and limitations of the study**

- 12  
13  
14  
15  
16 • The use of interviews and observation has provided rich data and clear insights into the  
17  
18 invisible work that patients and informal carers undertake whilst sharing the journey of  
19  
20 recovery from a hip fracture in acute care  
21
- 22  
23 • Family centred strategies are required to support patients and informal carers process the  
24  
25 emotional and physical consequences of hip fracture as they make changes to their lives  
26  
27 within the context of age, disability and dependency  
28
- 29  
30 • The framework developed from this exploratory study requires further review in diverse  
31  
32 samples to assess its transferability  
33  
34  
35  
36

## 37 **INTRODUCTION**

38  
39  
40 This study explores the experience of patients who have had a hip fracture and their informal carers,  
41  
42 a term used to describe supportive and caring relationships with family and friends. In England,  
43  
44 Wales and Northern Ireland the National Hip Fracture Database (NHFD) identified 66,313 people  
45  
46 aged 60 or older who experienced a hip fracture in 2018, with a mortality rate of 6.1% up to 30 days  
47  
48 after injury.<sup>[1]</sup> Estimates of 12% mortality at 4 months and 20% at 1 year have been made for those  
49  
50 over 80 years of age. In addition, there is a significant reduction in ability to walk and Health Related  
51  
52 Quality of Life at 1 year compared to preinjury.<sup>[2]</sup> Increased support for independent living, or a  
53  
54 change in living arrangements is evident, in 2018 in England, Wales and Northern Ireland 31% of  
55  
56 patients did not return to their original residence.<sup>[1]</sup>  
57  
58  
59  
60

Short title: Experience of hip fracture

Evidence from patient experience of hip fracture indicates that recovery is arduous and support from informal carers is required. Patients can feel frailer and emotionally vulnerable.<sup>[3]</sup> To gain control, they balance their need for help with a determination to be independent, despite potential risks to their safety.<sup>[4]</sup> In their own home, they can feel outside the 'umbrella of care' and unsupported.<sup>[5]</sup> Patients make adaptations to their lives in the context of anxiety, feeling burdened and uncertain about the future.<sup>[6]</sup> In hospital patients experience pain, indignity and can feel dehydrated, dislike being dependent on staff but often feel unready for discharge.<sup>[5]</sup> Patients identify relationships with staff as crucial, that staff know them, validate their needs and involve them in their care.<sup>[7,8]</sup> Informal carers of people with hip fractures find caring for others rewarding but stressful. The core concept 'engaging in care: struggling through', identifies how informal carers learnt from experience, negotiated the unknown, and changed their lives to encompass caring whilst aiming to keep themselves healthy.<sup>[9]</sup>

The burden of recovery for patients and their informal carers is evident, the experience of early recovery whilst in acute care is less clear. In order to provide direction for support and rehabilitation this study explores the research questions, i) what are older people's experiences of hip fracture, including those with memory loss and ii) what are informal carers' experiences of being alongside them whilst they are in acute care.

## **METHODS**

The methodology drew on phenomenology<sup>[10]</sup> in order to understand the participant's lived experience, used previously in orthopaedic trauma.<sup>[11-13]</sup> Phenomenology enabled experience to be explored within participant's historical, social and cultural contexts, and focus on what was important to them. A full discussion of the methods for this study is provided in the protocol.<sup>[14]</sup> The methods used were interviews and participant observation.

1 Short title: Experience of hip fracture

2  
3 Ethics

4  
5 Ethical approval was provided by the National Research Ethics Committee London, Riverside,  
6  
7 Camberwell and St Giles in August 2015 Ref: 15/LO/1205. All participants with capacity provided  
8  
9 informed written consent, received a participant information sheet and had at least 24 hours to  
10  
11 consider their participation. For patients with memory loss, a personal consultee, a family member  
12  
13 or friend, provided written informed advice that in their opinion the patient would not object to  
14  
15 taking part. Inclusionary consent<sup>[15]</sup>, where the researcher is constantly alert to cues indicating the  
16  
17 patient's degree of comfort with their presence underpinned the methods. In addition, clinical staff  
18  
19 identified the patient's mood, activities and when the observation could safely take place.  
20  
21  
22  
23  
24

25 Participants

26  
27 Thirty six patients with a hip fracture took part, 25 patient interviews, participant observation (52  
28  
29 hours) with 13 patients (2 patients chose interviews and observation), 11 did not have capacity to  
30  
31 consent and personal consultees were obtained. The age range was 63-91 years (median 83), 10  
32  
33 were male and interviews were 15-55 minutes long (average 28). 12 staff consented to be present  
34  
35 during the observation. Interviews with 25 informal carers took place, the age range was 42-95,  
36  
37 (median 62), 11 were male. Of these five were partners and 20 were daughter/son, younger family  
38  
39 members or a friend. The interviews took 20-55 minutes (average 26). Three patients declined to  
40  
41 take part due to tiredness, which alongside the shortness of some interviews indicates the frailty of  
42  
43 this group.  
44  
45  
46  
47  
48  
49

50 Participant observation

51  
52 Participant observation, up to four hours at a time and informal chats about their experience were  
53  
54 obtained by sitting with patients. Interactions were conversational, following patient's interests,  
55  
56 with prompts such as, what is it like, using this walking frame? Field notes were written as soon as  
57  
58 possible after the interaction.  
59  
60



1 Short title: Experience of hip fracture  
2  
3  
4

5 Interviews  
6

7 Interviews took place on the ward, in a meeting room or ward area. For patients the interviews led  
8 with the question, tell me about what it is like to have a hip fracture? Informal carers were asked,  
9 tell me what it is like caring for your relative/friend with a hip fracture? Prompts were used to  
10 enable participants to expand on aspects of their experience such as what did that feel like? What  
11 did you think? Tell me more about that?  
12  
13  
14  
15  
16  
17  
18  
19  
20

21 Patient and Public Involvement (PPI)  
22

23 PPI through the Oxford led UK Musculoskeletal Trauma group and clinical staff were involved  
24 throughout this study, initiating the research questions, helping shape the design, analysis of the  
25 data and dissemination through publication and conferences. Resonance with the findings was  
26 found with additional individual perspectives such as feeling alone in your own emotional bubble,  
27 not realising others have similar feelings.  
28  
29  
30  
31  
32  
33  
34  
35  
36

37 Analysis  
38

39 Interviews were digitally, audio recorded and transcribed verbatim. Analysis was undertaken by  
40 drawing together sentences with underlying meaning into codes. For example both patients and  
41 informal carers described seeing a physical change in the patients; 'I am full of holes' and 'she looks  
42 and feels very unglamorous'. These codes were gathered together under the category 'being visibly  
43 changed'. This was combined with two other categories, being unable to walk and enduring indignity  
44 and pain to create the theme 'being changed'. The themes convey the overall experience, drawing  
45 together the codes and categories into a central thread or 'structures of experience' <sup>[16]</sup> (p79). The  
46 analysis was led by ET with LSC, who undertook data collection, with regular discussion with the  
47 team to reflect on interpretation of the data. Both researchers were experienced female, health care  
48 researchers, with PhDs and prior experience of patients with traumatic injury (ET) and psychology  
49  
50  
51  
52  
53  
54  
55  
56  
57  
58  
59  
60

1 Short title: Experience of hip fracture

2  
3 (LSC) and had no contact with the participants prior to the study. Management of data was  
4  
5 facilitated by the use of NVivo 11, a qualitative software package. Rigour was demonstrated through  
6  
7 trustworthiness.<sup>[17]</sup> The researchers were immersed in the data, provided a clear audit trail of the  
8  
9 research process, a framework of the findings with quotes to illustrate the themes. The sample and  
10  
11 context has been described to enable transferability of the data. To maintain anonymity participants  
12  
13 were allocated a number and letter P for patient and C for informal carer. A copy of their transcript  
14  
15 was offered to participants but they declined.  
16  
17

## 21 FINDINGS

### 24 Sharing the journey

25  
26 The experience of having a hip fracture was a point of transition, where sharing the journey  
27  
28 identified the emotional and physical work undertaken by patients and informal carers as they  
29  
30 strived to remain connected and move forward at a time of change. The dynamic shift in  
31  
32 relationships and interdependency is demonstrated through three themes: i) connecting in order to  
33  
34 sustain relationships, ii) living with uncertainty, and iii) enduring change.  
35  
36

### 38 Connecting in order to sustain relationships

39  
40  
41 Connecting in order to sustain relationships identified how being together changed, which required  
42  
43 working with emotions and engaging in care. Working with emotions demonstrated how feelings  
44  
45 were expressed or contained in order to sustain relationships. Engaging in care highlighted the  
46  
47 intense activity undertaken by carers through presence, orientating and supporting their family  
48  
49 member.  
50

#### 52 *i) Working with emotions*

53  
54  
55 The participants demonstrated a closeness to each other where lives intertwined and mutual  
56  
57 support was provided. Many couples lived together, one couple for 55 years. Injury disrupted  
58  
59 everyday life, there was a loss of companionship and informal carers tried to keep busy but could  
60

Short title: Experience of hip fracture

1  
2  
3 feel out of control, lonely, bored or depressed “now it is all haywire I can’t explain why but its  
4  
5 haywire” (C15). For carers witnessing physical and emotional deterioration required suppression of  
6  
7 emotions or distancing strategies. Delirium, memory loss, behavioural change and the possibility of  
8  
9 death was particularly hard, as carers felt distressed but powerless to help. Carer’s own emotions  
10  
11 fluctuated often depending on the patient’s state.  
12  
13

14  
15 *I mean she’s deteriorated in a few days so rapidly from the person she was on Monday, it is*  
16  
17 *quite scary really and it is horrible to see and know how much she is suffering and so yes I*  
18  
19 *was finding it very hard and very worried. She’s a bit brighter in herself today and yesterday*  
20  
21 *even though she still feels terrible, so I’m feeling a bit better. (C13)*  
22  
23

24 Energy was required to achieve calmness and to prevent expression of fear and frustration whilst  
25  
26 visiting. Strategies that helped were timing of visits, short breaks away from the bedside or  
27  
28 reduction in visiting time. Containing emotions in light of rapid, visual deterioration was hard to  
29  
30 maintain.  
31  
32

33  
34 *I’ve drawn up here (in the car) and thought I’m not sure I can face it and it’s the babbling I*  
35  
36 *don’t like, it scares me and how ill she looks. (C4)*  
37  
38

39 Carers worked hard to contain their feelings to protect patients but struggled to find an emotional  
40  
41 balance.  
42

#### 43 *ii) Engaging in care*

44  
45  
46 In order to sustain a connection carers actively engaged in care using three strategies, presence,  
47  
48 orientating and supporting. Although challenging, regular, long periods of physical presence was  
49  
50 important to sustain relationships, understand clinical progress and the patient’s experience.

51  
52  
53 Orientating occurred through visual and conversational cues to direct patients away from confused  
54  
55 thoughts back to day to day reality. Carers acted as a conduit to staff, provided simple explanations  
56  
57 to patients and also informed staff about the patient.  
58  
59  
60

Short title: Experience of hip fracture

1  
2  
3 *I think she is reliant on me to be this kind of filter between her and what's going on. I think*  
4 *she does rely on me to tell her what's what although she'll dismiss it...she's not really able to*  
5 *take part in much conversation...I don't think she's able to. (C19)*  
6  
7  
8  
9

10 Supporting was an active process of undertaking practical activities often built on existing knowledge  
11 of the person such as mental stimulation, nutrition and hydration. Patients worried about their  
12 partners and how they coped without their practical support. For carers containing their own  
13 feelings combined with engaging in care was hard work, exhausting and sometimes felt like a battle  
14 if care needs were not met as expected.  
15  
16  
17  
18  
19  
20  
21  
22  
23

24 Theme: 2) Living with uncertainty  
25  
26  
27  
28

29 Living with uncertainty conveyed how participants learnt to live with frailty and death as part of life  
30 by i) confronting the future, ii) regaining normality and iii) working it through. Confronting the future  
31 identified their readiness to actively work through thoughts and feelings about recovery and death.  
32 Regaining normality demonstrated the struggle to move and undertake daily activities whilst being  
33 unsure of what was possible. Working it through, showed how carers process the impact of injury  
34 through the experience of everyday life.  
35  
36  
37  
38  
39  
40  
41  
42  
43

44 *i) Confronting the future*  
45  
46  
47  
48

49 Confronting the future was problematic for both patients and carers. Frank conversations between  
50 patients and their carers could be constrained if either were not ready to think about the future or  
51 mental ability was limited.  
52  
53  
54  
55  
56  
57  
58  
59  
60

Short title: Experience of hip fracture

1  
2  
3 *'I don't know what's going to happen in the future and I don't really want to talk about it'. No*  
4 *he (the patient) doesn't want to talk about it because he thinks it's the end of the road (death).*  
5  
6  
7 *(C22)*  
8  
9

10 The need to maintain autonomy and a meaningful life was evident alongside a growing realisation  
11 that life may be different from prior to injury.  
12  
13

14  
15 *"I would hate not to be independent but it would make sense after this. I am 90". She said to*  
16 *me that she likes to make her own decisions and "I like to be independent" "I like to be in*  
17 *charge of my life". (P34, Observation)*  
18  
19  
20  
21

22 For carers uncertainty about the future underpinned a determination to push for recovery. Carers  
23 were fearful that patients would not progress without more physiotherapy and massive  
24 encouragement.  
25  
26  
27  
28

29  
30 *I shouted at him rather, I didn't shout nastily but I tried to coax him to put his trust in them, he*  
31 *seems nervous which is understandable I suppose really, isn't it, but I can...I say to come on*  
32 *you must do it, you won't get home. (C15)*  
33  
34  
35  
36

37 Getting a balance between rest and activity for patients was important and they struggled with  
38 confidence and having the energy to maintain activities throughout the day.  
39  
40  
41  
42  
43

#### 44 *ii) Regaining normality*

45  
46  
47

48 Getting back to normal was the ideal outcome for patients and carers but the extent to which this  
49 was possible was uncertain.  
50  
51  
52

53 *We were hoping to get her a little bit more mobile but I think with this broken hip now, that's*  
54 *probably a forlorn hope. (C14)*  
55  
56  
57  
58  
59  
60

1 Short title: Experience of hip fracture

2  
3 The process of recovery was a new experience, largely unknown and patients were anxious about  
4  
5 how they were going to get better.  
6  
7

8 *What's it like, a bloody nightmare. I'm generally pretty active, I don't sit down for long and*  
9  
10 *I'm known for always doing something ... I don't even know how long it will take, nobody's*  
11  
12 *actually told me that yet either. (P29)*  
13  
14

15 Patients felt they had limited control over what they could do but also felt they needed to change,  
16  
17 their thoughts, feeling and actions, for example, acquire resilience, fortitude and a 'lorry load of  
18  
19 patience' (P24). There was sadness at their loss of activities and hope that they could get back to  
20  
21 how they were before.  
22  
23

24  
25 *Well to be fully mobile again and go back, well not maybe 100% of my old ways but being*  
26  
27 *able to fend for myself because I'm quite happy living on my own. (P29)*  
28  
29

30 The degree of recovery was unknown but there was acceptance that to move forward they needed  
31  
32 help and had to come to terms with a slower more careful way of life.  
33  
34

### 35 *iii) Working it through*

36  
37 Working it through was an experiential process in which carers learnt to manage the impact of injury  
38  
39 on daily life. Time and energy was required to work out what was best. Carers felt responsible for  
40  
41 the quality of life their family member might have but struggled with the uncertainty of recovery.  
42  
43 Some carers negotiated the death of their family member and appreciated staff support.  
44  
45 Responsibility existed alongside a realisation there were no easy solutions and the consequences of  
46  
47 caring could be life changing.  
48  
49

50  
51 *You just get on with it don't you, I can't abandon her I've got to do it so yes it's frustrating*  
52  
53 *and it's tiring at times as well but I just do it. (C2)*  
54  
55

56 Carers felt that the patients deserved 'a chance' of recovery (C21) and should have proactive  
57  
58 rehabilitation. Many carers had already or were making adaptations to their lives to accommodate  
59  
60

Short title: Experience of hip fracture

1  
2  
3 caring and needed to balance care with juggling multiple competing demands on their time, often  
4  
5 leaving them tired, unable to sleep and worried about their own health.  
6  
7  
8  
9

10 Theme 3: Being changed  
11  
12  
13  
14

15 Being changed conveyed a loss of self as patients lived with a body that looks and feels different,  
16  
17 endure limited mobility, indignity and pain and negotiated interdependence with others. This was  
18  
19 identified through i) being visibly changed, ii) not being able to walk and iii) enduring indignity and  
20  
21 pain.  
22  
23  
24

25 *i) Being visibly changed*  
26  
27

28 Patients described their body as visually changed by age and further damaged by injury and  
29  
30 treatment.  
31  
32

33 *"I am full of holes". (P12, Observation)*  
34  
35

36 Injury had changed what they could do and they had no choice but to work with their body and  
37  
38 accept the changes.  
39  
40

41 *I have abused my body by breaking my hip but we just get on and we're all working together,*  
42  
43 *my brain and my hip and my body, we're all working together to get back together again.*  
44

45 *(P1)*  
46  
47

48 Some patients experienced increasing frailty and felt that hip fracture was inevitable due to their  
49  
50 decline in wellbeing, confidence, health and physical robustness. There was a struggle to come to  
51  
52 terms with ageing.  
53  
54

55 *I think somebody should have drummed it into my stupid head that it was a real risk and yet I*  
56  
57 *knew it was a real risk and I did nothing about it. (P12)*  
58  
59  
60

1 Short title: Experience of hip fracture

2  
3 Patients were concerned that their ability to maintain their appearance, hair, nails, makeup and  
4  
5 clothes as they would normally had been disrupted by injury.  
6  
7

8 *I looked in the mirror just now and I thought my god what a mess. My hair is all messed up.*

9  
10 (P 4)

11  
12  
13 *"It might fall off, my tooth..." "I feel like a witch". (P27, Observation)*

14  
15  
16 Being visibly changed by injury and unable to keep up normal daily activities added to a sense of  
17  
18 being old and a loss of self. Patients and carers found this emotionally hard to process but worked  
19  
20 hard to improve the patient's appearance.  
21  
22

23 *ii) Not being able to walk*

24  
25  
26 The loss of the ability to walk due to injury and subsequent pain had a devastating impact on  
27  
28 patient's everyday life and what they felt they could do when home.  
29

30  
31 *Very unpleasant and very painful, very frustrating. Any words like that to describe it because*  
32  
33 *I'm an active person, I have been all my life with the wife, because your life is cut off near*  
34  
35 *enough. It's soul destroying I find it when you've just got to lay here and you can't do*  
36  
37 *anything at all except to say the physio gives me exercises, yes I'll do them I want to get back*  
38  
39 *to normal again. At the moment I can't stand on my feet so I'm not quite sure how long it's*  
40  
41 *going to be. (P2)*  
42  
43

44  
45 Activities that are normally taken for granted required conscious, deliberate thought followed by  
46  
47 action. They felt they had to be stoic 'don't complain get on with it' (P9), 'obey certain rules and  
48  
49 regulations' (P5a), concentrate, be careful, find their balance and slowly re-learn how to manage  
50  
51 their body in order to regain any spontaneity or freedom of movement. Not being able to walk or  
52  
53 move as fluidly as they did before led to greater dependency on others. It also impacted on other  
54  
55 areas of their body and pre-existing mobility problems. Learning to move and normal taken for  
56  
57 granted activities involved great concentration and determination but was also tiring and frustrating.  
58  
59  
60



Short title: Experience of hip fracture

1  
2  
3 *iii) Enduring indignity and pain*  
4  
5

6 Enduring indignity and pain was a normal part of hospital life but caused a high degree of distress, 'it  
7 is insulting, it is frustrating' (P27, observation). No one was comfortable with the public nature of  
8 toileting. Frustration and anxiety were also exacerbated by existing chronic conditions.  
9  
10

11  
12  
13 *Well it makes you into a baby because you can't do anything for yourself. You become*  
14 *disabled I suppose, you need help to go to the toilet, you can't even sit up without help and*  
15 *you have to wear a nappy which does annoy me. (P3)*  
16  
17  
18  
19

20 Accessing timely care was difficult due to the busyness of the environment and patients managed by  
21 watching for the appropriate staff to ask for help, waiting for help to come and accepting any help  
22 offered, 'I have to wait' (P32, Observation) and 'then if you bed is wet, they said why you have done  
23 it?' (P35, observation).  
24  
25  
26  
27  
28

29 Loss of control over their ability to meet their own needs could be exacerbated by little things such  
30 as understanding, when several people talk at the same time 'she was afraid and did not  
31 understand' (P32, observation). Getting the balance right between enabling patients to maintain  
32 autonomy and ensuring they were cared for was a challenge for carers. Patients had a stoic  
33 approach to enduring the indignity of hospital life, did the best they could, listened to advice and  
34 hoped in the future.  
35  
36  
37  
38  
39  
40  
41  
42

43 *Just keep your mouth shut, eat the grub and do as you're told. (P29)*  
44  
45

46 Enduring pain was considered an everyday event and at times pain could be overwhelming. Several  
47 had managed pain for a long time. Being believed and staff acting on reports of pain, learning to live  
48 with pain and medication helped. Lack of staff input, their own experience and knowledge about  
49 injury and anxiety about pain could hamper their ability to feel in control of pain. Occasionally poor  
50 care was noted 'you wouldn't let a dog or an animal be in pain like that would you' (C25). Patients  
51 with memory loss appeared to be enduring pain particularly on movement often expressed in  
52 different ways and needed careful management to avoid indignity.  
53  
54  
55  
56  
57  
58  
59  
60

Short title: Experience of hip fracture

1  
2  
3 *She cooperated but she had a bit of pain. She expressed it with her face or sounds. When the*  
4 *assistant washed her legs she complained more: "It always this leg"; "it is sore". She looked*  
5 *and touched her bruises on her leg and hip. (P31, Observation)*  
6  
7  
8  
9

10 Enduring indignity and pain were therefore part of everyday life for patients and they managed by  
11 being stoic, being watchful and waiting for support.  
12  
13

## 14 **Discussion**

15  
16  
17  
18 This qualitative study adds to recent research<sup>[5,6,8,9]</sup> and identifies how patients and their informal  
19 carers shared the journey of hip fracture, through connecting in order to sustain relationships, living  
20 with uncertainty and being changed. We specifically focussed on acute care and included patients  
21 with memory loss. The suddenness of injury precipitated a confrontation with ageing, frailty,  
22 uncertainty, dependency and death. A point of biographical disruption<sup>[18]</sup> and transition with  
23 elements of vulnerability<sup>[19]</sup> and endurance<sup>[11]</sup> identified in recovery from injury. Our findings  
24 indicate that greater clinical attention is required to support the mental and physical wellbeing of  
25 patients and informal carers. This requires a family/friend centred approach that recognises hip  
26 fracture as a time of significant change.  
27  
28  
29  
30  
31  
32  
33  
34  
35  
36  
37  
38

39 There were some limitations to our study. The sample was limited to the population on the wards  
40 and was not ethnically diverse. Further observations of people with memory loss and interviews with  
41 multidisciplinary staff could add to the understanding of the culture of care. However, the sample  
42 was purposive, people with memory loss were included, saturation of data, where no new themes  
43 occur was achieved and PPI work suggests there is resonance with the findings.  
44  
45  
46  
47  
48  
49

50 Despite these limitations, this study highlights that clinically supportive activities in acute care are  
51 required that: i) sustain opportunities for companionship, ii) enable the processing of emotions as a  
52 consequence of injury and iii) facilitate caring interactions in relation to pain and intimate bodily  
53 care. Creating opportunities for companionship and involvement underpins person centred care <sup>[20]</sup>.  
54  
55  
56  
57  
58  
59 However the experience of involvement can be inconsistent and families may struggle to acquire it.  
60

Short title: Experience of hip fracture

[7,21] Being included, being useful and being part of daily life may reflect the human connectedness noted as essential for partnership working that provides a basis for decision making [22]. Education and support may enable the identification of, expression and processing of strong emotions allowing families to develop skills to live with change and uncertainty. Being aware of the burden of caring and the importance of self-compassion[23,24] may prevent compassion fatigue. Relationships with multidisciplinary staff, patient and family that are open and responsive to knowledge exchange, valuing carer expertise[7,25] help to identify what matters to them. Caring interactions, good bodily care, pain assessment which is often underestimated by professionals[26] and management are fundamental for older people. Organisational care can compound feelings of insignificance and powerlessness[7,27], be misaligned with patients' needs,[27] and should challenge feelings of inevitability and decline.[28] Negotiating a balance between individual autonomy and dependency on others for help, when injured, is challenging and for informal carers this continues after discharge.[9] However, enabling patients to feel comfortable and in control,[29] appreciative caring conversations,[30] valuing their identity, building relationships and involvement[7] is essential.

### Conclusion

This study identified the hidden work undertaken by patients and informal carers in sharing the journey of hip fracture, a challenging life transition epitomised by uncertainty and change. Sustaining relationships was crucial and supportive, family/friend centred multidisciplinary strategies that enable successful negotiation of the emotional and practical challenges of hip fracture recovery are required. Research should focus on developing interventions that help patients and informal carers to manage this transition and develop skills that provide the foundation for living fulfilled lives.

1 Short title: Experience of hip fracture  
2

3 **STATEMENTS**  
4

5 **Funding statement**  
6

7  
8 This work was supported by the Trauma Research, Kadoorie Centre for Critical Care Research and Education  
9 and the Department of Health.  
10

11 **Competing interests**  
12

13 No benefits have been received or will be received from a commercial party related directly or indirectly to the  
14 subject of this article.  
15

16 **Acknowledgements**  
17

18 The authors would like to thank all the patients and informal carers who generously gave their time and  
19 energy to support this study. In addition we would like to thank the PPI participants and all the staff who  
20 facilitated aspects of this study, particularly Chris Bouse.  
21

22 **Author contributions**  
23

24 ET and LSC drafted this paper. The design and analysis was led by ET with LSC who undertook the data  
25 collection. The team DL, JW, and KW supported the project, were involved in discussion of the findings and the  
26 development of this paper. KW obtained funding for the study.  
27

28 **Ethical approval**  
29

30 The project was given ethical approval by National Research Ethics Committee London - Riverside and  
31 Camberwell and St Giles in August 2015 REF: 15/LO/1205.  
32

33 **Consent and Confidentiality**  
34

35 All participants received an information sheet at least 24 hours prior to an event. Written informed consent or  
36 a personal consultee agreement were obtained.  
37

38 **Check list**  
39

40 The checklist has been completed and submitted.  
41

42 **Data sharing statement**  
43

44 We do not have consent for data sharing from the study participants.  
45

Short title: Experience of hip fracture

### Exclusive License

I, the Submitting Author has the right to grant and does grant on behalf of all authors of the Work (as defined in the below author licence), an exclusive licence and/or a non-exclusive licence for contributions from authors who are: i) UK Crown employees; ii) where BMJ has agreed a CC-BY licence shall apply, and/or iii) in accordance with the terms applicable for US Federal Government officers or employees acting as part of their official duties; on a worldwide, perpetual, irrevocable, royalty-free basis to BMJ Publishing Group Ltd ("BMJ") its licensees and where the relevant Journal is co-owned by BMJ to the co-owners of the Journal, to publish the Work in BMJ Open and any other BMJ products and to exploit all rights, as set out in our [licence](#).

The Submitting Author accepts and understands that any supply made under these terms is made by BMJ to the Submitting Author unless you are acting as an employee on behalf of your employer or a postgraduate student of an affiliated institution which is paying any applicable article publishing charge ("APC") for Open Access articles. Where the Submitting Author wishes to make the Work available on an Open Access basis (and intends to pay the relevant APC), the terms of reuse of such Open Access shall be governed by a Creative Commons licence – details of these licences and which [Creative Commons](#) licence will apply to this Work are set out in our licence referred to above.

### REFERENCES

1. RCP. National hip fracture database annual report. London: RCP, 2019.
2. Griffin XL, Parsons N, Achten J, et al. Recovery of health-related quality of life in a United Kingdom hip fracture population. The Warwick Hip Trauma Evaluation--a prospective cohort study. *Bone Joint J* 2015;97-B(3):372-82. doi: 10.1302/0301-620X.97B3.35738 [published Online First: 2015/03/05]
3. Ziden L, Scherman MH, Wenestam CG. The break remains - elderly people's experiences of a hip fracture 1 year after discharge. *Disabil Rehabil* 2010;32(2):103-13. doi: 10.3109/09638280903009263 [published Online First: 2009/06/30]

Short title: Experience of hip fracture

- 1  
2  
3 4. McMillan L, Booth J, Currie K, et al. A grounded theory of taking control after fall-induced hip  
4  
5 fracture. *Disabil Rehabil* 2012;34(26):2234-41. doi: 10.3109/09638288.2012.681006  
6  
7 [published Online First: 2012/05/17]  
8  
9
- 10 5. Brett J. Exploring the lived experience of having a hip fracture: identifying patients' perspectives on  
11  
12 their health care needs. University of Warwick, 2014.  
13
- 14 6. Rasmussen B, Uhrenfeldt L. Establishing well-being after hip fracture: a systematic review and  
15  
16 meta-synthesis. *Disabil Rehabil* 2016;38(26):2515-29. doi: 10.3109/09638288.2016.1138552  
17  
18 [published Online First: 2016/02/11]  
19
- 20 7. Bridges J, Collins P, Flatley M, et al. Older people's experiences in acute care settings: Systematic  
21  
22 review and synthesis of qualitative studies. *Int J Nurs Stud* 2020;102:103469. doi:  
23  
24 10.1016/j.ijnurstu.2019.103469 [published Online First: 2019/12/22]  
25  
26  
27
- 28 8. Nicholson C, Morrow EM, Hicks A, et al. Supportive care for older people with frailty in hospital:  
29  
30 An integrative review. *Int J Nurs Stud* 2017;66:60-71. doi: 10.1016/j.ijnurstu.2016.11.015  
31  
32 [published Online First: 2016/12/25]  
33
- 34 9. Saletti-Cuesta L, Tutton E, Langstaff D, et al. Understanding informal carers' experiences of caring  
35  
36 for older people with a hip fracture: a systematic review of qualitative studies. *Disabil*  
37  
38 *Rehabil* 2018;40(7):740-50. doi: 10.1080/09638288.2016.1262467  
39  
40
- 41 10. Heidegger M. Being and Time. Oxford: Blackwell Publishing Ltd 1962.  
42
- 43 11. Keene DJ, Mistry D, Nam J, et al. The Ankle Injury Management (AIM) trial: a pragmatic,  
44  
45 multicentre, equivalence randomised controlled trial and economic evaluation comparing  
46  
47 close contact casting with open surgical reduction and internal fixation in the treatment of  
48  
49 unstable ankle fractures in patients aged over 60 years. *Health Technol Assess*  
50  
51 2016;20(75):1-158. doi: 10.3310/hta20750  
52  
53
- 54 12. Tutton E, Achten J, Lamb SE, et al. A qualitative study of patient experience of an open fracture  
55  
56 of the lower limb during acute care. *Bone Joint J* 2018;100-B(4):522-26. doi: 10.1302/0301-  
57  
58 620X.100B4.BJJ-2017-0891.R1  
59  
60

Short title: Experience of hip fracture

- 1  
2  
3  
4  
5  
6  
7  
8  
9  
10  
11  
12  
13  
14  
15  
16  
17  
18  
19  
20  
21  
22  
23  
24  
25  
26  
27  
28  
29  
30  
31  
32  
33  
34  
35  
36  
37  
38  
39  
40  
41  
42  
43  
44  
45  
46  
47  
48  
49  
50  
51  
52  
53  
54  
55  
56  
57  
58  
59  
60
13. Phelps EE, Tutton E, Griffin X, et al. Facilitating trial recruitment: A qualitative study of patient and staff experiences of an orthopaedic trauma trial. *Trials* 2019;20(1):492. doi: 10.1186/s13063-019-3597-8 [published Online First: 2019/08/11]
14. Saletti-Cuesta L, Tutton E, Langstaff D, et al. Understanding patient and relative/carer experience of hip fracture in acute care: A qualitative study protocol. *Int J Orthop Trauma Nurs* 2017;25:36-41. doi: 10.1016/j.ijotn.2016.09.002
15. Dewing J. Process consent and research with older persons living with dementia *Research Ethics Review* 2008;4(2):59-64.
16. Van Manen M. *Researching Lived Experience, human science for an action sensitive pedagogy.* Albany: State University of New York Press 1990.
17. Lincoln YS, Guba E. *Naturalistic Inquiry.* Newbury Park, California: Sage Publications Inc 1985.
18. Bury M. Chronic illness as biographical disruption. *Social Health Illn* 1982;4(2):167-82. doi: 10.1111/1467-9566.ep11339939 [published Online First: 1982/06/10]
19. Tutton E, J. Lamb, SE. Willett, K. Costa, M. on behalf of the UK WOLFF research collaborators A qualitative study of the experience of an open fracture of the lower limb in acute care. *The Bone and Joint Journal* 2018;100-B:522-6.
20. Kelley R, Godfrey M, Young J. The impacts of family involvement on general hospital care experiences for people living with dementia: An ethnographic study. *Int J Nurs Stud* 2019;96:72-81. doi: 10.1016/j.ijnurstu.2019.04.004 [published Online First: 2019/05/06]
21. Petry H, Ernst J, Steinbruchel-Boesch C, et al. The acute care experience of older persons with cognitive impairment and their families: A qualitative study. *Int J Nurs Stud* 2019;96:44-52. doi: 10.1016/j.ijnurstu.2018.11.008 [published Online First: 2019/01/21]
22. Wolf A, Moore L, Lydahl D, et al. The realities of partnership in person-centred care: a qualitative interview study with patients and professionals. *BMJ Open* 2017;7(7):e016491. doi: 10.1136/bmjopen-2017-016491 [published Online First: 2017/07/19]

Short title: Experience of hip fracture

- 1  
2  
3  
4  
5  
6  
7  
8  
9  
10  
11  
12  
13  
14  
15  
16  
17  
18  
19  
20  
21  
22  
23  
24  
25  
26  
27  
28  
29  
30  
31  
32  
33  
34  
35  
36  
37  
38  
39  
40  
41  
42  
43  
44  
45  
46  
47  
48  
49  
50  
51  
52  
53  
54  
55  
56  
57  
58  
59  
60
23. Andrews H, Tierney S, Seers K. Needing permission: The experience of self-care and self-compassion in nursing: A constructivist grounded theory study. *Int J Nurs Stud* 2020;101:103436. doi: 10.1016/j.ijnurstu.2019.103436 [published Online First: 2019/11/02]
24. McPherson S, Hiskey S, Alderson Z. Distress in working on dementia wards - A threat to compassionate care: A grounded theory study. *Int J Nurs Stud* 2016;53:95-104. doi: 10.1016/j.ijnurstu.2015.08.013 [published Online First: 2015/09/20]
25. McPherson KM, Kayes NK, Moloczij N, et al. Improving the interface between informal carers and formal health and social services: a qualitative study. *Int J Nurs Stud* 2014;51(3):418-29. doi: 10.1016/j.ijnurstu.2013.07.006 [published Online First: 2013/08/10]
26. Seers T, Derry S, Seers K, et al. Professionals underestimate patients' pain: a comprehensive review. *Pain* 2018 doi: 10.1097/j.pain.0000000000001165
27. Featherstone K, Northcott A, Bridges J. Routines of resistance: An ethnography of the care of people living with dementia in acute hospital wards and its consequences. *Int J Nurs Stud* 2019;96:53-60. doi: 10.1016/j.ijnurstu.2018.12.009 [published Online First: 2019/01/27]
28. Samra R, Griffiths A, Cox T, et al. Medical students' and doctors' attitudes towards older patients and their care in hospital settings: a conceptualisation. *Age Ageing* 2015;44(5):776-83. doi: 10.1093/ageing/afv082 [published Online First: 2015/07/18]
29. Baillie L. Patient dignity in an acute hospital setting: a case study. *Int J Nurs Stud* 2009;46(1):23-36. doi: 10.1016/j.ijnurstu.2008.08.003
30. Dewar B, Nolan M. Caring about caring: developing a model to implement compassionate relationship centred care in an older people care setting. *Int J Nurs Stud* 2013;50(9):1247-58. doi: 10.1016/j.ijnurstu.2013.01.008 [published Online First: 2013/02/23]



## COREQ (COnsolidated criteria for REporting Qualitative research) Checklist

A checklist of items that should be included in reports of qualitative research. You must report the page number in your manuscript where you consider each of the items listed in this checklist. If you have not included this information, either revise your manuscript accordingly before submitting or note N/A.

| Topic                                          | Item No. | Guide Questions/Description                                                                                                                              | Reported on Page No. |
|------------------------------------------------|----------|----------------------------------------------------------------------------------------------------------------------------------------------------------|----------------------|
| <b>Domain 1: Research team and reflexivity</b> |          |                                                                                                                                                          |                      |
| <i>Personal characteristics</i>                |          |                                                                                                                                                          |                      |
| Interviewer/facilitator                        | 1        | Which author/s conducted the interview or focus group?                                                                                                   |                      |
| Credentials                                    | 2        | What were the researcher's credentials? E.g. PhD, MD                                                                                                     |                      |
| Occupation                                     | 3        | What was their occupation at the time of the study?                                                                                                      |                      |
| Gender                                         | 4        | Was the researcher male or female?                                                                                                                       |                      |
| Experience and training                        | 5        | What experience or training did the researcher have?                                                                                                     |                      |
| <i>Relationship with participants</i>          |          |                                                                                                                                                          |                      |
| Relationship established                       | 6        | Was a relationship established prior to study commencement?                                                                                              |                      |
| Participant knowledge of the interviewer       | 7        | What did the participants know about the researcher? e.g. personal goals, reasons for doing the research                                                 |                      |
| Interviewer characteristics                    | 8        | What characteristics were reported about the interviewer/facilitator? e.g. Bias, assumptions, reasons and interests in the research topic                |                      |
| <b>Domain 2: Study design</b>                  |          |                                                                                                                                                          |                      |
| <i>Theoretical framework</i>                   |          |                                                                                                                                                          |                      |
| Methodological orientation and Theory          | 9        | What methodological orientation was stated to underpin the study? e.g. grounded theory, discourse analysis, ethnography, phenomenology, content analysis |                      |
| <i>Participant selection</i>                   |          |                                                                                                                                                          |                      |
| Sampling                                       | 10       | How were participants selected? e.g. purposive, convenience, consecutive, snowball                                                                       |                      |
| Method of approach                             | 11       | How were participants approached? e.g. face-to-face, telephone, mail, email                                                                              |                      |
| Sample size                                    | 12       | How many participants were in the study?                                                                                                                 |                      |
| Non-participation                              | 13       | How many people refused to participate or dropped out? Reasons?                                                                                          |                      |
| <i>Setting</i>                                 |          |                                                                                                                                                          |                      |
| Setting of data collection                     | 14       | Where was the data collected? e.g. home, clinic, workplace                                                                                               |                      |
| Presence of non-participants                   | 15       | Was anyone else present besides the participants and researchers?                                                                                        |                      |
| Description of sample                          | 16       | What are the important characteristics of the sample? e.g. demographic data, date                                                                        |                      |
| <i>Data collection</i>                         |          |                                                                                                                                                          |                      |
| Interview guide                                | 17       | Were questions, prompts, guides provided by the authors? Was it pilot tested?                                                                            |                      |
| Repeat interviews                              | 18       | Were repeat interviews carried out? If yes, how many?                                                                                                    |                      |
| Audio/visual recording                         | 19       | Did the research use audio or visual recording to collect the data?                                                                                      |                      |
| Field notes                                    | 20       | Were field notes made during and/or after the interview or focus group?                                                                                  |                      |
| Duration                                       | 21       | What was the duration of the interviews or focus group?                                                                                                  |                      |
| Data saturation                                | 22       | Was data saturation discussed?                                                                                                                           |                      |
| Transcripts returned                           | 23       | Were transcripts returned to participants for comment and/or                                                                                             |                      |

| Topic                                  | Item No. | Guide Questions/Description                                                                                                        | Reported on Page No. |
|----------------------------------------|----------|------------------------------------------------------------------------------------------------------------------------------------|----------------------|
|                                        |          | correction?                                                                                                                        |                      |
| <b>Domain 3: analysis and findings</b> |          |                                                                                                                                    |                      |
| <i>Data analysis</i>                   |          |                                                                                                                                    |                      |
| Number of data coders                  | 24       | How many data coders coded the data?                                                                                               |                      |
| Description of the coding tree         | 25       | Did authors provide a description of the coding tree?                                                                              |                      |
| Derivation of themes                   | 26       | Were themes identified in advance or derived from the data?                                                                        |                      |
| Software                               | 27       | What software, if applicable, was used to manage the data?                                                                         |                      |
| Participant checking                   | 28       | Did participants provide feedback on the findings?                                                                                 |                      |
| <i>Reporting</i>                       |          |                                                                                                                                    |                      |
| Quotations presented                   | 29       | Were participant quotations presented to illustrate the themes/findings?<br>Was each quotation identified? e.g. participant number |                      |
| Data and findings consistent           | 30       | Was there consistency between the data presented and the findings?                                                                 |                      |
| Clarity of major themes                | 31       | Were major themes clearly presented in the findings?                                                                               |                      |
| Clarity of minor themes                | 32       | Is there a description of diverse cases or discussion of minor themes?                                                             |                      |

Developed from: Tong A, Sainsbury P, Craig J. Consolidated criteria for reporting qualitative research (COREQ): a 32-item checklist for interviews and focus groups. *International Journal for Quality in Health Care*. 2007. Volume 19, Number 6: pp. 349 – 357

**Once you have completed this checklist, please save a copy and upload it as part of your submission. DO NOT include this checklist as part of the main manuscript document. It must be uploaded as a separate file.**

# BMJ Open

## Patient and informal carer experience of hip fracture: A qualitative study using interviews and observation in acute orthopaedic trauma

|                                 |                                                                                                                                                                                                                                                                                                                                                                                                                                                                                                                                        |
|---------------------------------|----------------------------------------------------------------------------------------------------------------------------------------------------------------------------------------------------------------------------------------------------------------------------------------------------------------------------------------------------------------------------------------------------------------------------------------------------------------------------------------------------------------------------------------|
| Journal:                        | <i>BMJ Open</i>                                                                                                                                                                                                                                                                                                                                                                                                                                                                                                                        |
| Manuscript ID                   | bmjopen-2020-042040.R1                                                                                                                                                                                                                                                                                                                                                                                                                                                                                                                 |
| Article Type:                   | Original research                                                                                                                                                                                                                                                                                                                                                                                                                                                                                                                      |
| Date Submitted by the Author:   | 03-Nov-2020                                                                                                                                                                                                                                                                                                                                                                                                                                                                                                                            |
| Complete List of Authors:       | Tutton, Elizabeth; University of Oxford, NDORMS<br>Saletti-Cuesta, Lorena; Culture and Society Research and Study Centre, National Scientific and Technical Research Council (CIECS-CONICET-UNC)<br>Langstaff, Debbie; Oxford University Hospitals NHS Foundation Trust<br>Wright, Julie; Oxford University Hospitals NHS Foundation Trust<br>Grant, Richard; Patient representative,<br>Willett, Keith; Kadoorie Research Centre, Nuffield Department of Orthopaedics, Rheumatology and Musculoskeletal Science, University of Oxford |
| <b>Primary Subject Heading</b>: | Qualitative research                                                                                                                                                                                                                                                                                                                                                                                                                                                                                                                   |
| Secondary Subject Heading:      | Health services research, Surgery                                                                                                                                                                                                                                                                                                                                                                                                                                                                                                      |
| Keywords:                       | Orthopaedic & trauma surgery < SURGERY, Hip < ORTHOPAEDIC & TRAUMA SURGERY, Quality in health care < HEALTH SERVICES ADMINISTRATION & MANAGEMENT                                                                                                                                                                                                                                                                                                                                                                                       |
|                                 |                                                                                                                                                                                                                                                                                                                                                                                                                                                                                                                                        |

SCHOLARONE™  
Manuscripts

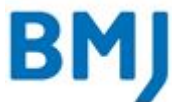

I, the Submitting Author has the right to grant and does grant on behalf of all authors of the Work (as defined in the below author licence), an exclusive licence and/or a non-exclusive licence for contributions from authors who are: i) UK Crown employees; ii) where BMJ has agreed a CC-BY licence shall apply, and/or iii) in accordance with the terms applicable for US Federal Government officers or employees acting as part of their official duties; on a worldwide, perpetual, irrevocable, royalty-free basis to BMJ Publishing Group Ltd ("BMJ") its licensees and where the relevant Journal is co-owned by BMJ to the co-owners of the Journal, to publish the Work in this journal and any other BMJ products and to exploit all rights, as set out in our [licence](#).

The Submitting Author accepts and understands that any supply made under these terms is made by BMJ to the Submitting Author unless you are acting as an employee on behalf of your employer or a postgraduate student of an affiliated institution which is paying any applicable article publishing charge ("APC") for Open Access articles. Where the Submitting Author wishes to make the Work available on an Open Access basis (and intends to pay the relevant APC), the terms of reuse of such Open Access shall be governed by a Creative Commons licence – details of these licences and which [Creative Commons](#) licence will apply to this Work are set out in our licence referred to above.

Other than as permitted in any relevant BMJ Author's Self Archiving Policies, I confirm this Work has not been accepted for publication elsewhere, is not being considered for publication elsewhere and does not duplicate material already published. I confirm all authors consent to publication of this Work and authorise the granting of this licence.

Short title: Experience of hip fracture

**Patient and informal carer experience of hip fracture: A qualitative study using interviews and observation in acute orthopaedic trauma**

**\*Elizabeth Tutton<sup>1,3</sup>, Lorena Saletti-Cuesta<sup>2</sup>, Debbie Langstaff<sup>3</sup>, Julie Wright<sup>3</sup>, Richard Grant<sup>4</sup>, Keith Willett<sup>1</sup>**

<sup>1</sup>*Oxford Trauma and Emergency Care, Kadoorie Centre, Nuffield Department of Orthopaedics, Rheumatology and Musculoskeletal Sciences, University of Oxford*

<sup>2</sup>*Culture and Society Research and Study Centre, National Scientific and Technical Research Council (CIECS-CONICET-UNC), Cordoba, Argentina*

<sup>3</sup>*Oxford University Hospitals NHS Foundation Trust, John Radcliffe Hospital, OX3 9DU, UK*

<sup>4</sup>*Patient and Public Involvement Partner*

**Email addresses:** \*liz.tutton@ndorms.ox.ac.uk, lorenasaletti@unc.edu.ar,

debbie.langstaff12345@gmail.com, Julie.wright@ouh.nhs.uk, grantrichard73@aol.co.uk,

keith.willett@nhs.net

**\*CORRESPONDING AUTHOR**

Elizabeth Tutton

liz.tutton@ndorms.ox.ac.uk

Tel: 01865 223106

**Kadoorie Centre**

**Level 3, John Radcliffe Hospital**

**Oxford OX3 9DU**

**Keywords:** injury, recovery, hip fracture, experience, qualitative, patients, informal carers

Short title: Experience of hip fracture

1  
2  
3 **ABSTRACT**  
4  
5  
6  
7

8 **Objectives:** The time taken for older people to recover from hip fracture can be extensive. The aim  
9  
10 of this study was to gain an understanding of patient and informal carer experience of recovery in  
11  
12 the early stage, whilst in acute care.  
13  
14

15  
16  
17 **Design:** A phenomenological (lived experience) approach was used to guide the design of the study.  
18  
19 Interviews and observation took place between March 2016 and December 2016 in acute care.  
20  
21  
22

23  
24 **Setting:** Trauma wards in an NHS Foundation Trust in the South West of England.  
25  
26  
27

28 **Participants:** A purposive sample of 25 patients were interviewed and observation taking 52 hours  
29  
30 was undertaken with 13 patients and 12 staff. 11 patients had memory loss, two patients chose to  
31  
32 take part in an interview and observation. The age range was 63-91 years (median 83), 10 were  
33  
34 male. A purposive sample of 25 informal carers were also interviewed, the age range was 42-95  
35  
36 (mean 64), 11 were male.  
37  
38  
39  
40  
41

42 **Results:** The results identified how participants moved forward together after injury by sharing the  
43  
44 journey. This was conveyed through three themes: i) sustaining relationships whilst experiencing  
45  
46 strong emotions and actively helping, ii) becoming aware of uncertainty about the future and  
47  
48 working through possible outcomes, iii) being changed, visibly looking different, not being able to  
49  
50 walk and enduring indignity and pain.  
51  
52  
53

54  
55 **Conclusion:** This study identified the experience of patients and informal carers as they shared the  
56  
57 journey during a challenging life transition. Strategies that support wellbeing and enable successful  
58  
59 negotiation of the emotional and practical challenges of acute care may help with longer term  
60

1 Short title: Experience of hip fracture

2  
3 recovery. Research should focus on developing interventions that promote wellbeing during this  
4  
5 transition to help provide the foundation for patients and carers to live fulfilled lives.  
6  
7  
8  
9

## 10 **ARTICLE SUMMARY**

### 11 **Strengths and limitations of the study**

- 12  
13  
14  
15  
16 • The use of interviews and observation has provided rich data and clear insights into patient's  
17 and informal carer's experience of sharing the journey of recovery from a hip fracture during  
18 acute care  
19
- 20  
21  
22 • Involving patients with memory loss through observation ensured their experience was  
23 included within the analysis  
24
- 25  
26  
27 • Inclusionary consent where the researcher was alert to the patient's comfort with their  
28 presence was important during observation  
29
- 30  
31  
32 • The themes developed from this exploratory study require further review in diverse samples  
33 to assess the transferability  
34
- 35  
36  
37 • Inclusion of healthcare staff in the sample would situate the shared journey of recovery  
38 within the context of care  
39

## 40 **INTRODUCTION**

41  
42  
43  
44 This study explores the experience of patients who have had a hip fracture and their informal carers,  
45  
46 a term used to describe supportive and caring relationships with family and friends. This could be a  
47  
48 partner, their daughter or son, relative or a friend. In the 2011 Census 5.8 million people provided  
49  
50 unpaid care to family or friends.<sup>[1]</sup> In England, Wales and Northern Ireland the National Hip Fracture  
51  
52 Database (NHFD) identified 66,313 people aged 60 or older who experienced a hip fracture in 2018,  
53  
54 with a mortality rate of 6.1% up to 30 days after injury.<sup>[2]</sup> Estimates of 12% mortality at 4 months and  
55  
56 20% at 1 year have been made for those over 80 years of age. Treatment for hip fracture is normally  
57  
58  
59  
60

Short title: Experience of hip fracture

1  
2  
3 surgery either fixation or arthroplasty<sup>[3]</sup> and UK health care costs have been estimated to be 2 billion  
4  
5 pounds.<sup>[4]</sup> In addition, there is a significant reduction in ability to walk and Health Related Quality of  
6  
7 Life at 1 year compared to preinjury.<sup>[3]</sup> Increased support for independent living, or a change in living  
8  
9 arrangements is evident. In 2018 in England, Wales and Northern Ireland 31% of patients did not  
10  
11 return to their original residence.<sup>[2]</sup>  
12  
13

14  
15  
16 Evidence from patient experience of hip fracture indicates that recovery is arduous and support  
17  
18 from informal carers is required. Patients can feel frailer and emotionally vulnerable.<sup>[5,6]</sup> To gain  
19  
20 control, they balance their need for help with a determination to be independent, despite potential  
21  
22 risks to their safety.<sup>[7]</sup> In their own home, they can feel outside the 'umbrella of care' and  
23  
24 unsupported.<sup>[8]</sup> Patients make adaptations to their lives in the context of anxiety, feeling burdened and  
25  
26 uncertain about the future.<sup>[9]</sup> In hospital patients experience pain, indignity and can feel dehydrated.  
27  
28 They dislike being dependent on staff but often feel unready for discharge.<sup>[8]</sup> Patients identify  
29  
30 relationships with staff as crucial. They want staff to know them, validate their needs and involve  
31  
32 them in their care.<sup>[10,11]</sup> Informal carers of people with hip fractures find caring for others rewarding  
33  
34 but stressful. The core concept 'engaging in care: struggling through', identifies how informal carers  
35  
36 learnt from experience, negotiated the unknown, and changed their lives to encompass caring whilst  
37  
38 aiming to keep themselves healthy.<sup>[12]</sup>  
39  
40  
41  
42  
43  
44  
45

46 There is growing evidence of the prolonged burden of recovery from hip fracture and generic  
47  
48 evidence of the quality of care for older patients in acute care. However there is limited evidence  
49  
50 specifically related to the experience of hip fracture from patient and carer perspectives during early  
51  
52 recovery whilst in acute care. Therefore this study aims to provide direction for support and  
53  
54 rehabilitation by exploring the research questions, i) what are older people's experiences of hip  
55  
56 fracture, including those with memory loss and ii) what are informal carers' experiences of being  
57  
58 alongside them whilst they are in acute care.  
59  
60



Short title: Experience of hip fracture

## METHODS

The methodology drew on phenomenology<sup>[13]</sup> in order to understand the participant's lived experience as used previously in orthopaedic trauma.<sup>[14-16]</sup> Phenomenology enabled experience to be explored within participant's social and cultural contexts in order to illicit what was important to them. Meaning inherent in the participant's experience was drawn out through a process of interpretation. Interpretation involved reading, listening and reflecting on elements that were of concern to participants whilst being aware of the researchers own positionality, for example role and experience. A full discussion of the methods for this study is provided in the protocol.<sup>[17]</sup> The methods used were interviews and participant observation.

### Ethics

Ethical approval was provided by the National Research Ethics Committee London, Riverside, Camberwell and St Giles in August 2015 Ref: 15/LO/1205. All participants with capacity provided informed written consent, received a participant information sheet and had at least 24 hours to consider their participation. For patients with memory loss, a personal consultee, a family member or friend, provided written informed advice that in their opinion the patient would not object to taking part. Inclusionary consent<sup>[18]</sup>, where the researcher is constantly alert to cues indicating the patient's degree of comfort with their presence underpinned the methods. In addition, clinical staff caring for the patient provided written informed consent to take part in the observation and identified the patient's mood, activities and when the observation could safely take place. However due to the high level of acuity of other patients and pace of work during the study period staff involvement was limited.

### Participants

A purposive sample of thirty six patients with a hip fracture took part. There were 25 patient interviews and 13 patients took part in 52 hours of participant observation (2 patients chose

Short title: Experience of hip fracture

1  
2  
3 interviews and observation). Eleven of the 13 patients did not have capacity to consent and personal  
4  
5 consultees were obtained. The patient sample aimed to obtain a range of sex, age, and include those  
6  
7 without capacity. The carer sample aimed to obtain a range of sex, age and a range of relationships  
8  
9 with the patients. Details of the sample are supplied in Table 1, Information about the participants.  
10  
11 The patient age range was 63-91 years (median 83), 10 were male and interviews were 15-55  
12  
13 minutes long (average 28). Time since admission was 4-19 days (median 9 days). 12 staff consented  
14  
15 to be present during the observation. Interviews with 25 informal carers took place, the age range  
16  
17 was 42-95, (median 62), 11 were male. Of these five were partners and 20 were daughter/son,  
18  
19 younger family members or a friend. There were 12 dyads where both patient and their carer were  
20  
21 interviewed. The interviews took 20-55 minutes (average 26). Three patients were invited to take  
22  
23 part but declined to take part due to tiredness, which alongside the shortness of some interviews  
24  
25 indicates the frailty of this group.  
26  
27  
28  
29  
30  
31

### Participant observation

32  
33 Participant observation, up to four hours at a time and informal chats about their experience were  
34  
35 obtained by sitting with patients. Interactions were conversational, following patients' interests,  
36  
37 with prompts such as, what is it like using this walking frame? Field notes were written as soon as  
38  
39 possible after the interaction.  
40  
41  
42  
43  
44  
45

### Interviews

46  
47 Interviews took place on the ward, in a meeting room or ward area. The interviews were  
48  
49 conversational in style, often including aspects of daily life to enable participants to feel comfortable  
50  
51 and able to tell the researcher what was important to them. For patients the interviews led with the  
52  
53 question, tell me about what it is like to have a hip fracture? Informal carers were asked, tell me  
54  
55 what it is like caring for your relative/friend with a hip fracture? Prompts were used to enable  
56  
57  
58  
59  
60

1 Short title: Experience of hip fracture

2  
3 participants to expand on aspects of their experience such as what did that feel like? What did you  
4 think? Tell me more about that?  
5  
6  
7  
8  
9

10 Patient and Public Involvement (PPI)

11  
12 PPI was through the Oxford led UK Musculoskeletal Trauma group who at the time met regularly  
13 with clinical and research staff to discuss research studies. This group were involved in shaping the  
14 research question, design of the study and identified the importance of including patients with  
15 memory loss. Two PPI partners were involved in two discussions during analysis to reflect on the  
16 evolving structure. Four PPI partners read the findings, could relate to them and felt that many  
17 aspects of their own experience were reflected in the paper. Additional individual perspectives  
18 included feeling alone in your own emotional bubble, not realising others have similar feelings.  
19  
20  
21  
22  
23  
24  
25  
26  
27  
28  
29

30 Analysis

31  
32 Interviews were digitally, audio recorded and transcribed verbatim. Analysis was undertaken by  
33 drawing together sentences with underlying meaning into codes. For example both patients and  
34 informal carers described seeing a physical change in the patients; 'I am full of holes' and 'she looks  
35 and feels very unglamorous'. These codes were gathered together under the category 'being visibly  
36 changed'. This was combined with two other categories, being unable to walk and enduring indignity  
37 and pain to create the theme 'being changed'. The themes convey the overall experience, drawing  
38 together the codes and categories into a central thread or 'structures of experience' <sup>[19]</sup> (p79). Carer  
39 and patient data contributed to all the themes but carer data led the theme i) connecting in order to  
40 sustain relationships and patient data led the theme iii) being changed. The analysis was led by ET  
41 with LSC, who undertook data collection, with regular discussion with the team to reflect on  
42 interpretation of the data. Both researchers were experienced female, health care researchers, with  
43 PhDs and prior experience of patients with traumatic injury (ET) and psychology (LSC) and had no  
44 contact with the participants prior to the study. Management of data was facilitated by the use of  
45  
46  
47  
48  
49  
50  
51  
52  
53  
54  
55  
56  
57  
58  
59  
60

Short title: Experience of hip fracture

NVivo 11, a qualitative software package. Rigour was demonstrated through trustworthiness.<sup>[20]</sup> Key elements of trustworthiness were that the researchers were immersed in the data, provided a clear audit trail of the research process, and supported the thematic framework with quotes to illustrate the themes. The sample and context has been described to enable transferability of the data. To maintain anonymity participants were allocated a number and letter P for patient and C for informal carer. A copy of their transcript was offered to participants but they declined. Observations were written by the researcher in the form of field notes and include quotes from the patients.

## FINDINGS

### Sharing the journey

The experience of having a hip fracture was a point of transition, where sharing the journey identified the emotional and physical work undertaken by patients and informal carers as they strived to remain connected and move forward at a time of change. The dynamic shift in relationships and interdependency was demonstrated through three themes: i) 'connecting in order to sustain relationships', with categories of working with emotions and engaging in care, ii) 'living with uncertainty', with categories of confronting the future, regaining normality and working it through and iii) 'being changed' with categories of being visibly changed, not being able to walk and enduring indignity and pain. Figure 1, presents the themes and categories for sharing the journey.

### Connecting in order to sustain relationships

Connecting in order to sustain relationships identified how being together changed, which required working with emotions and engaging in care. Working with emotions demonstrated how feelings were expressed or contained in order to sustain relationships. Engaging in care highlighted the intense activity undertaken by carers through presence, orientating and supporting their family member.

#### *i) Working with emotions*

1 Short title: Experience of hip fracture

2  
3 The participants demonstrated a closeness to each other where lives intertwined and mutual  
4 support was provided. Many couples lived together, one couple for 55 years. Injury disrupted  
5 everyday life and there was a loss of companionship. Carers tried to keep busy but could feel out of  
6 control, lonely, bored or depressed “now it is all haywire I can’t explain why but it’s haywire” (C15).  
7  
8 For carers, witnessing physical and emotional deterioration required suppression of emotions or  
9 distancing strategies. Delirium, memory loss, behavioural change and the possibility of death was  
10 particularly hard for carers who felt distressed and powerless to help. Carer’s own emotions often  
11 fluctuated depending on the patient’s state.  
12  
13

14  
15  
16  
17  
18  
19  
20  
21 *I mean she has deteriorated in a few days so rapidly from the person she was on Monday. It*  
22 *is quite scary really. It is horrible to see and know how much she is suffering and so yes I was*  
23 *finding it very hard and was very worried. She is a bit brighter in herself today and yesterday*  
24 *even though she still feels terrible, so I’m feeling a bit better. (C13)*  
25  
26  
27  
28  
29

30  
31 Whilst visiting energy was required to achieve calmness and to prevent expression of fear and  
32 frustration. Strategies that helped were timing of visits, short breaks away from the bedside or  
33 reduction in visiting time. Containing emotions in light of rapid, visual deterioration was hard to  
34 maintain.  
35  
36  
37  
38

39  
40  
41 *I’ve drawn up here (in the car) and thought I’m not sure I can face it and it is the babbling I*  
42 *don’t like, it scares me and how ill she looks. (C4)*  
43  
44

45 Carers worked hard to contain their feelings to protect patients but struggled to find an emotional  
46 balance.  
47  
48

#### 49 *ii) Engaging in care*

50  
51  
52  
53 In order to sustain a connection carers actively engaged in care using three strategies: presence,  
54 orientating and supporting. Although challenging, regular long periods of physical presence was  
55 important to sustain relationships, understand clinical progress and the patient’s experience.  
56  
57

58 Orientating occurred through visual and conversational cues to direct patients away from confused  
59  
60

1 Short title: Experience of hip fracture

2  
3 thoughts back to day to day reality. Carers acted as a conduit to staff, provided simple explanations  
4  
5 to patients and also informing staff about the patient.  
6  
7

8 *I think she is reliant on me to be this kind of filter between her and what is going on. I think*  
9  
10 *she does rely on me to tell her what's what although she'll dismiss it...she's not really able to*  
11  
12 *take part in much conversation...I don't think she's able to. (C19)*  
13  
14

15 Supporting was an active process of undertaking practical activities often built on existing knowledge  
16  
17 of the person such as mental stimulation, nutrition and hydration. For carers containing their own  
18  
19 feelings combined with engaging in care was hard work, exhausting and sometimes felt like a battle  
20  
21 if care needs were not met as expected.  
22  
23  
24  
25  
26

27 Theme: 2) Living with uncertainty  
28  
29  
30

31 Living with uncertainty conveyed how participants learnt to live with frailty and death as part of life  
32  
33 by i) confronting the future, ii) regaining normality and iii) working it through. Confronting the future  
34  
35 identified their readiness to actively work through thoughts and feelings about recovery and death.  
36  
37 Regaining normality demonstrated the struggle to move and undertake daily activities whilst being  
38  
39 unsure of what was possible. Working it through, showed how carers process the impact of injury  
40  
41 through the experience of everyday life.  
42  
43  
44  
45  
46

47 *i) Confronting the future*  
48  
49  
50

51 Confronting the future was problematic for both patients and carers. Frank conversations between  
52  
53 patients and their carers could be constrained if either were not ready to think about the future or  
54  
55 mental ability was limited.  
56  
57  
58  
59  
60

1 Short title: Experience of hip fracture  
2

3 *He tells me "I don't know what's going to happen in the future and I don't really want to talk*  
4 *about it". No he (the patient) doesn't want to talk about it because he thinks it's the end of the*  
5 *road (death). (C22)*  
6  
7  
8  
9

10 The need to maintain autonomy and a meaningful life was evident alongside a growing realisation  
11 that life may be different from prior to injury.  
12

13  
14  
15 *"I would hate not to be independent but it would make sense after this. I am 90". She said to*  
16 *me that she likes to make her own decisions and "I like to be independent" "I like to be in*  
17 *charge of my life". (P34, Observation)*  
18  
19  
20  
21

22 For carers uncertainty about the future underpinned a determination to push for recovery. Carers  
23 were fearful that patients would not progress without more physiotherapy and massive  
24 encouragement.  
25  
26  
27  
28

29  
30 *I shouted at him rather, I didn't shout nastily but I tried to coax him to put his trust in them, he*  
31 *seems nervous which is understandable I suppose really, isn't it, but I can...I say to come on*  
32 *you must do it, you won't get home. (C15)*  
33  
34  
35  
36

37 Getting a balance between rest and activity for patients was important and they struggled with  
38 confidence and having the energy to maintain activities throughout the day.  
39  
40  
41  
42  
43

#### 44 *ii) Regaining normality* 45 46 47

48 Getting back to normal was the ideal outcome for patients and carers but the extent to which this  
49 was possible was uncertain.  
50  
51  
52

53 *We were hoping to get her a little bit more mobile but I think with this broken hip now, that's*  
54 *probably a forlorn hope. (C14)*  
55  
56  
57  
58  
59  
60

Short title: Experience of hip fracture

The process of recovery was a new experience, largely unknown and patients were anxious about how they were going to get better.

*What's it like, a bloody nightmare. I'm generally pretty active, I don't sit down for long and I'm known for always doing something ... I don't even know how long it will take, nobody's actually told me that yet either. (P29)*

Patients felt they had limited control over what they could do but also felt they needed to change, their thoughts, feeling and actions. For example, acquire resilience, fortitude and a 'lorry load of patience' (P24). There was sadness at their loss of activities and hope that they could get back to how they were before.

*Well to be fully mobile again and go back, well not maybe 100% of my old ways but being able to fend for myself because I'm quite happy living on my own. (P29)*

The degree of recovery was unknown but there was acceptance that to move forward they needed help and had to come to terms with a slower more careful way of life.

### *iii) Working it through*

Working it through was an experiential process in which carers learnt to manage the impact of injury on daily life. Time and energy was required to work out what was best. Carers felt responsible for the quality of life their family member might have but struggled with the uncertainty of recovery.

Some carers negotiated the death of their family member and appreciated staff support.

Responsibility existed alongside a realisation there were no easy solutions and the consequences of caring could be life changing.

*You just get on with it don't you, I can't abandon her I've got to do it so yes it's frustrating and it's tiring at times as well but I just do it. (C2)*

Carers felt that the patients deserved 'a chance' of recovery (C21) and should have proactive rehabilitation. Many carers had already or were making adaptations to their lives to accommodate



1 Short title: Experience of hip fracture  
2

3 caring and needed to balance care with juggling multiple competing demands on their time, often  
4  
5 leaving them tired, unable to sleep and worried about their own health.  
6  
7  
8  
9

10 Theme 3: Being changed  
11  
12  
13  
14

15 Being changed conveyed a loss of self as patients lived with a body that looks and feels different,  
16  
17 endured limited mobility, indignity and pain and negotiated interdependence with others. This was  
18  
19 identified through i) being visibly changed, ii) not being able to walk and iii) enduring indignity and  
20  
21 pain.  
22  
23  
24

25 *i) Being visibly changed*  
26  
27

28 Patients described their body as visually changed by age and further damaged by injury and  
29  
30 treatment.  
31  
32

33 *"I am full of holes". (P12, Observation)*  
34  
35

36 Injury had changed what they could do and they had no choice but to work with their body and  
37  
38 accept the changes.  
39  
40

41 *I have abused my body by breaking my hip but we just get on and we're all working together,*  
42  
43 *my brain and my hip and my body, we're all working together to get back together again.*  
44

45 *(P1)*  
46  
47

48 Some patients experienced increasing frailty and felt that hip fracture was inevitable due to their  
49  
50 decline in wellbeing, confidence, health and physical robustness. There was a struggle to come to  
51  
52 terms with ageing.  
53  
54

55 *I think somebody should have drummed it into my stupid head that it was a real risk and yet I*  
56  
57 *knew it was a real risk and I did nothing about it. (P12)*  
58  
59  
60

Short title: Experience of hip fracture

Patients were concerned that their ability to maintain their appearance, hair, nails, makeup and clothes as they would normally had been disrupted by injury.

*I looked in the mirror just now and I thought my god what a mess. My hair is all messed up.*

*(P 4)*

*"It might fall off, my tooth..." "I feel like a witch". (P27, Observation)*

Being visibly changed by injury and unable to keep up normal daily activities added to a sense of being old and a loss of self. Patients and carers found this emotionally hard to process but worked hard to improve the patient's appearance.

*ii) Not being able to walk*

The loss of the ability to walk due to injury and subsequent pain had a devastating impact on patients and what they felt they could do when home.

*Very unpleasant and very painful, very frustrating. Any words like that to describe it because I'm an active person, I have been all my life with the wife, because your life is cut off near enough. It's soul destroying I find it when you've just got to lay here and you can't do anything at all except to say the physio gives me exercises, yes I'll do them I want to get back to normal again. At the moment I can't stand on my feet so I'm not quite sure how long it's going to be. (P2)*

Activities that are normally taken for granted required conscious, deliberate thought followed by action. They felt they had to be stoic 'don't complain get on with it' (P9), 'obey certain rules and regulations' (P5), concentrate, be careful, find their balance and slowly re-learn how to manage their body in order to regain any spontaneity or freedom of movement. Not being able to walk or move as fluidly as they did before led to greater dependency on others. It also impacted on other areas of their body and pre-existing mobility problems. Learning to move and normal 'taken for granted activities' involved great concentration and determination but was also tiring and frustrating.

Short title: Experience of hip fracture

iii) *Enduring indignity and pain*

Enduring or putting up with indignity and pain was a normal part of hospital life but caused a high degree of distress, 'it is insulting, it is frustrating' (P27, observation). No one was comfortable with the public nature of toileting. Frustration and anxiety were also exacerbated by existing chronic conditions.

*Well it makes you into a baby because you can't do anything for yourself. You become disabled I suppose, you need help to go to the toilet, you can't even sit up without help and you have to wear a nappy which does annoy me. (P3)*

Accessing timely care was difficult due to the busyness of the environment and patients managed by watching for the appropriate staff to ask for help, waiting for help to come and accepting any help offered, 'I have to wait' (P32, Observation) and 'then if you bed is wet, they said why you have done it?' (P35, observation).

Loss of control over their ability to meet their own needs could be exacerbated by little things such as understanding, when several people talk at the same time 'she was afraid and did not understand' (P32, observation). Getting the balance right between enabling patients to maintain autonomy and ensuring they were cared for was a challenge for carers. Patients had a stoic approach to enduring the indignity of hospital life, did the best they could, listened to advice and hoped in the future.

*Just keep your mouth shut, eat the grub and do as you're told. (P29)*

Enduring pain was considered an everyday event and at times pain could be overwhelming. Several had managed pain from chronic conditions for a long time. Being believed and staff acting on reports of pain, learning to live with pain and medication all helped. Lack of staff input, their own experience and knowledge about injury and anxiety about pain could hamper their ability to feel in control of pain. Occasionally poor care was noted 'you wouldn't let a dog or an animal be in pain like that would you' (C25). Patients with memory loss appeared to be enduring pain particularly on

Short title: Experience of hip fracture

1  
2  
3 movement. This was often expressed in different ways and needed careful management to avoid  
4  
5 indignity.  
6  
7

8 *She cooperated but she had a bit of pain. She expressed it with her face or sounds. When the*  
9 *assistant washed her legs she complained more: "It always this leg"; "it is sore". She looked*  
10 *and touched her bruises on her leg and hip. (P31, Observation)*  
11  
12  
13  
14

15 Enduring indignity and pain were therefore part of everyday life for patients and they managed by  
16 being stoic, being watchful and waiting for support.  
17  
18

## 19 20 Discussion

21  
22  
23 This qualitative study adds to recent research<sup>[8,9,11,12]</sup> and identifies how patients and their informal  
24 carers shared the journey of hip fracture, through connecting in order to sustain relationships, living  
25 with uncertainty and being changed. We specifically focussed on acute care and included patients  
26 with memory loss. The suddenness of injury precipitated a confrontation with ageing, frailty,  
27 uncertainty, dependency and death. A point of biographical disruption<sup>[21]</sup> and transition with  
28 elements of vulnerability and endurance as identified in recovery from injury.<sup>[14,22]</sup> Our findings  
29 indicate that hip fracture is a time of significant change where further support for mental and  
30 physical wellbeing may be required.  
31  
32  
33  
34  
35  
36  
37  
38  
39  
40

41 There were some limitations to our study. The sample was limited to the population on the wards  
42 and was not ethnically diverse. Further observations of people with memory loss and interviews with  
43 multidisciplinary staff could add to the understanding of the culture of care. However, the sample  
44 was purposive and people with memory loss were included. Data saturation where no new themes  
45 occur was achieved and PPI work suggests there is resonance with the findings.  
46  
47  
48  
49  
50  
51

52  
53 Despite these limitations, this study highlights that patients and informal carers may benefit from  
54 supportive activities in acute care that: i) sustain opportunities for companionship, ii) enable the  
55 processing of emotions as a consequence of injury and iii) facilitate caring interactions in relation to  
56 pain and intimate bodily care. To enhance support through this challenging transition understanding  
57  
58  
59  
60

Short title: Experience of hip fracture

gained from participants could be used within strategies such as person centred care, education and communication. Involvement of patients and their family underpins person centred care<sup>[23]</sup> although this aspect can be inconsistent and families may struggle to acquire it.<sup>[10,24]</sup> Opportunities for human connection through being included, being useful and being part of decisions are evident in partnership working.<sup>[25]</sup> Education and support may facilitate the identification of, expression and processing of strong emotions allowing families to develop skills to live with change and uncertainty. Helping carers to develop an awareness of the burden of caring<sup>[26,27]</sup> and the importance of self-compassion<sup>[28,29]</sup> may help prevent compassion fatigue. Relationships with multidisciplinary staff, patient and family that are open and responsive to knowledge exchange, valuing carer expertise<sup>[10,30]</sup> may help to identify what matters to them. Caring interactions, good bodily care, pain assessment which is often underestimated by professionals<sup>[31]</sup> may support older people to self-manage their changed bodies. Being aware that organisational care can compound feelings of insignificance and powerlessness<sup>[10,32]</sup>, be misaligned with patients' needs,<sup>[32]</sup> may help to challenge feelings of inevitability and decline.<sup>[33]</sup> Negotiating a balance between individual autonomy and dependency on others for help, when injured, is challenging and for informal carers this continues after discharge.<sup>[12]</sup> However, enabling patients to feel comfortable and in control,<sup>[34]</sup> appreciative caring conversations,<sup>[35]</sup> valuing their identity, building relationships and involvement<sup>[10]</sup> may support their negotiation of this challenging life transition.

## Conclusion

This study identified the experience of patients and informal carers in sharing the journey of hip fracture, a challenging life transition epitomised by uncertainty and change. Strategies that support wellbeing and enable successful negotiation of the emotional and practical challenges of acute care may help with longer term recovery. Research should focus on developing interventions that promote wellbeing during this transition to help provide the foundation for patients and carers to live fulfilled lives.

1 Short title: Experience of hip fracture  
2

3 **STATEMENTS**  
4

5  
6 **Funding statement**  
7

8 This work was supported by the Trauma Research, Kadoorie Centre for Critical Care Research and  
9 Education and the Department of Health.  
10

11  
12  
13 **Competing interests**  
14

15 No benefits have been received or will be received from a commercial party related directly or  
16 indirectly to the subject of this article.  
17

18  
19  
20  
21 **Acknowledgements**  
22

23 The authors would like to thank all the patients and informal carers who generously gave their time  
24 and energy to support this study. In addition we would like to thank the PPI partners and all the staff  
25 who facilitated aspects of this study, particularly Chris Bouse.  
26  
27  
28

29  
30  
31 **Author contributions**  
32

33 ET and LSC drafted this paper. The design and analysis was led by ET with LSC who undertook the  
34 data collection. DL, JW, and KW supported the project were involved in design, discussion of the  
35 findings and the development of this paper. RG was involved in the discussion of the findings and  
36 the development of this paper. KW provided funding for the study.  
37  
38  
39  
40  
41

42  
43 **Ethical approval**  
44

45 The project was given ethical approval by National Research Ethics Committee London - Riverside  
46 and Camberwell and St Giles in August 2015 REF: 15/LO/1205.  
47  
48

49  
50  
51 **Consent and Confidentiality**  
52

53 All participants received an information sheet at least 24 hours prior to an event. Written informed  
54 consent or a personal consultee agreement were obtained.  
55  
56

57  
58 **Check list**  
59  
60

1 Short title: Experience of hip fracture  
2

3 The checklist has been completed and submitted.  
4  
5

#### 6 **Data sharing statement** 7

8 We do not have consent for data sharing from the study participants.  
9

#### 10 **Exclusive License** 11

12  
13  
14 I, the Submitting Author has the right to grant and does grant on behalf of all authors of the Work  
15 (as defined in the below author licence), an exclusive licence and/or a non-exclusive licence for  
16 contributions from authors who are: i) UK Crown employees; ii) where BMJ has agreed a CC-BY  
17 licence shall apply, and/or iii) in accordance with the terms applicable for US Federal Government  
18 officers or employees acting as part of their official duties; on a worldwide, perpetual, irrevocable,  
19 royalty-free basis to BMJ Publishing Group Ltd (“BMJ”) its licensees and where the relevant Journal is  
20 co-owned by BMJ to the co-owners of the Journal, to publish the Work in BMJ Open and any other  
21 BMJ products and to exploit all rights, as set out in our licence.  
22  
23  
24  
25  
26  
27  
28  
29  
30  
31  
32  
33

34 The Submitting Author accepts and understands that any supply made under these terms is made by  
35 BMJ to the Submitting Author unless you are acting as an employee on behalf of your employer or a  
36 postgraduate student of an affiliated institution which is paying any applicable article publishing  
37 charge (“APC”) for Open Access articles. Where the Submitting Author wishes to make the Work  
38 available on an Open Access basis (and intends to pay the relevant APC), the terms of reuse of such  
39 Open Access shall be governed by a Creative Commons licence – details of these licences and  
40 which Creative Commons licence will apply to this Work are set out in our licence referred to above.  
41  
42  
43  
44  
45  
46  
47  
48  
49  
50  
51  
52

#### 53 **REFERENCES** 54

- 55  
56 1. White C. 2011 Census analysis: Unpaid care in England and Wales, 2011 and comparing with 2001:  
57 Office for National Statistics; 2013 [Available from:  
58 [https://webarchive.nationalarchives.gov.uk/20160109213406/http://www.ons.gov.uk/ons/  
59 dcp171766\\_300039.pdf](https://webarchive.nationalarchives.gov.uk/20160109213406/http://www.ons.gov.uk/ons/dcp171766_300039.pdf).  
60 2. RCP. National hip fracture database annual report. London: RCP, 2019.

Short title: Experience of hip fracture

3. Griffin XL, Parsons N, Achten J, et al. Recovery of health-related quality of life in a United Kingdom hip fracture population. The Warwick Hip Trauma Evaluation--a prospective cohort study. *Bone Joint J* 2015;97-B(3):372-82. doi: 10.1302/0301-620X.97B3.35738 [published Online First: 2015/03/05]
4. Svedbom A, Hernlund E, Ivergard M, et al. Osteoporosis in the European Union: a compendium of country-specific reports. *Arch Osteoporos* 2013;8:137. doi: 10.1007/s11657-013-0137-0 [published Online First: 2013/10/12]
5. Ziden L, Scherman MH, Wenestam CG. The break remains - elderly people's experiences of a hip fracture 1 year after discharge. *Disabil Rehabil* 2010;32(2):103-13. doi: 10.3109/09638280903009263 [published Online First: 2009/06/30]
6. Bruun-Olsen V, Bergland A, Heiberg KE. "I struggle to count my blessings": recovery after hip fracture from the patients' perspective. *BMC Geriatr* 2018;18(1):18. doi: 10.1186/s12877-018-0716-4 [published Online First: 2018/01/21]
7. McMillan L, Booth J, Currie K, et al. A grounded theory of taking control after fall-induced hip fracture. *Disabil Rehabil* 2012;34(26):2234-41. doi: 10.3109/09638288.2012.681006 [published Online First: 2012/05/17]
8. Brett J. Exploring the lived experience of having a hip fracture: identifying patients' perspectives on their health care needs. University of Warwick, 2014.
9. Rasmussen B, Uhrenfeldt L. Establishing well-being after hip fracture: a systematic review and meta-synthesis. *Disabil Rehabil* 2016;38(26):2515-29. doi: 10.3109/09638288.2016.1138552 [published Online First: 2016/02/11]
10. Bridges J, Collins P, Flatley M, et al. Older people's experiences in acute care settings: Systematic review and synthesis of qualitative studies. *Int J Nurs Stud* 2020;102:103469. doi: 10.1016/j.ijnurstu.2019.103469 [published Online First: 2019/12/22]
11. Nicholson C, Morrow EM, Hicks A, et al. Supportive care for older people with frailty in hospital: An integrative review. *Int J Nurs Stud* 2017;66:60-71. doi: 10.1016/j.ijnurstu.2016.11.015 [published Online First: 2016/12/25]
12. Saletti-Cuesta L, Tutton E, Langstaff D, et al. Understanding informal carers' experiences of caring for older people with a hip fracture: a systematic review of qualitative studies. *Disabil Rehabil* 2018;40(7):740-50. doi: 10.1080/09638288.2016.1262467
13. Heidegger M. *Being and Time*. Oxford: Blackwell Publishing Ltd 1962.
14. Keene DJ, Mistry D, Nam J, et al. The Ankle Injury Management (AIM) trial: a pragmatic, multicentre, equivalence randomised controlled trial and economic evaluation comparing close contact casting with open surgical reduction and internal fixation in the treatment of unstable ankle fractures in patients aged over 60 years. *Health Technol Assess* 2016;20(75):1-158. doi: 10.3310/hta20750
15. Tutton E, Achten J, Lamb SE, et al. A qualitative study of patient experience of an open fracture of the lower limb during acute care. *Bone Joint J* 2018;100-B(4):522-26. doi: 10.1302/0301-620X.100B4.BJJ-2017-0891.R1
16. Phelps EE, Tutton E, Griffin X, et al. Facilitating trial recruitment: A qualitative study of patient and staff experiences of an orthopaedic trauma trial. *Trials* 2019;20(1):492. doi: 10.1186/s13063-019-3597-8 [published Online First: 2019/08/11]
17. Saletti-Cuesta L, Tutton E, Langstaff D, et al. Understanding patient and relative/carer experience of hip fracture in acute care: A qualitative study protocol. *Int J Orthop Trauma Nurs* 2017;25:36-41. doi: 10.1016/j.ijotn.2016.09.002
18. Dewing J. Process consent and research with older persons living with dementia *Research Ethics Review* 2008;4(2):59-64.
19. Van Manen M. *Researching Lived Experience, human science for an action sensitive pedagogy*. Albany: State University of New York Press 1990.
20. Lincoln YS, Guba E. *Naturalistic Inquiry*. Newbury Park, California: Sage Publications Inc 1985.



Short title: Experience of hip fracture

21. Bury M. Chronic illness as biographical disruption. *Sociol Health Illn* 1982;4(2):167-82. doi: 10.1111/1467-9566.ep11339939 [published Online First: 1982/06/10]
22. Tutton EA, J. Lamb, SE. Willett, K. Costa, M. on behalf of the UK WOLFF research collaborators A qualitative study of the experience of an open fracture of the lower limb in acute care. *The Bone and Joint Journal* 2018;100-B:522-6.
23. Kelley R, Godfrey M, Young J. The impacts of family involvement on general hospital care experiences for people living with dementia: An ethnographic study. *Int J Nurs Stud* 2019;96:72-81. doi: 10.1016/j.ijnurstu.2019.04.004 [published Online First: 2019/05/06]
24. Petry H, Ernst J, Steinbruchel-Boesch C, et al. The acute care experience of older persons with cognitive impairment and their families: A qualitative study. *Int J Nurs Stud* 2019;96:44-52. doi: 10.1016/j.ijnurstu.2018.11.008 [published Online First: 2019/01/21]
25. Wolf A, Moore L, Lydahl D, et al. The realities of partnership in person-centred care: a qualitative interview study with patients and professionals. *BMJ Open* 2017;7(7):e016491. doi: 10.1136/bmjopen-2017-016491 [published Online First: 2017/07/19]
26. Parry JA, Langford JR, Koval KJ. Caregivers of hip fracture patients: The forgotten victims? *Injury* 2019;50(12):2259-62. doi: 10.1016/j.injury.2019.09.030 [published Online First: 2019/10/13]
27. Longo UG, Matarese M, Arcangeli V, et al. Family Caregiver Strain and Challenges When Caring for Orthopedic Patients: A Systematic Review. *J Clin Med* 2020;9(5) doi: 10.3390/jcm9051497 [published Online First: 2020/05/21]
28. Andrews H, Tierney S, Seers K. Needing permission: The experience of self-care and self-compassion in nursing: A constructivist grounded theory study. *Int J Nurs Stud* 2020;101:103436. doi: 10.1016/j.ijnurstu.2019.103436 [published Online First: 2019/11/02]
29. McPherson S, Hiskey S, Alderson Z. Distress in working on dementia wards - A threat to compassionate care: A grounded theory study. *Int J Nurs Stud* 2016;53:95-104. doi: 10.1016/j.ijnurstu.2015.08.013 [published Online First: 2015/09/20]
30. McPherson KM, Kayes NK, Moloczij N, et al. Improving the interface between informal carers and formal health and social services: a qualitative study. *Int J Nurs Stud* 2014;51(3):418-29. doi: 10.1016/j.ijnurstu.2013.07.006 [published Online First: 2013/08/10]
31. Seers T, Derry S, Seers K, et al. Professionals underestimate patients' pain: a comprehensive review. *Pain* 2018 doi: 10.1097/j.pain.0000000000001165
32. Featherstone K, Northcott A, Bridges J. Routines of resistance: An ethnography of the care of people living with dementia in acute hospital wards and its consequences. *Int J Nurs Stud* 2019;96:53-60. doi: 10.1016/j.ijnurstu.2018.12.009 [published Online First: 2019/01/27]
33. Samra R, Griffiths A, Cox T, et al. Medical students' and doctors' attitudes towards older patients and their care in hospital settings: a conceptualisation. *Age Ageing* 2015;44(5):776-83. doi: 10.1093/ageing/afv082 [published Online First: 2015/07/18]
34. Baillie L. Patient dignity in an acute hospital setting: a case study. *Int J Nurs Stud* 2009;46(1):23-36. doi: 10.1016/j.ijnurstu.2008.08.003
35. Dewar B, Nolan M. Caring about caring: developing a model to implement compassionate relationship centred care in an older people care setting. *Int J Nurs Stud* 2013;50(9):1247-58. doi: 10.1016/j.ijnurstu.2013.01.008 [published Online First: 2013/02/23]

Short title: Experience of hip fracture

Figure 1, Presents the themes and categories for sharing the journey

Table 1, Information about participants

| <b>Table 1 Information about the participants</b>                    |                               |
|----------------------------------------------------------------------|-------------------------------|
| <b>Characteristics</b>                                               | <b>Number of participants</b> |
| <b>Patients</b>                                                      |                               |
| Sex                                                                  |                               |
| <i>Male</i>                                                          | 10                            |
| <i>Female</i>                                                        | 15                            |
| Age (years) median 83, range 63-91                                   |                               |
| Time since admission for hip fracture (days)<br>Median 9, range 4-19 |                               |
| Participation in interviews                                          | 25                            |
| Participation in observation                                         | 13                            |
| Consented                                                            | 25                            |
| Personal consultee due to lack of capacity                           | 11                            |
| Participation in interview and observation                           | 2                             |
| Invited but declined to participate                                  | 3                             |
| Patient and carer dyads                                              | 12                            |
|                                                                      |                               |
| <b>Carers</b>                                                        |                               |
| Sex                                                                  |                               |
| <i>Male</i>                                                          | 11                            |
| <i>Female</i>                                                        | 14                            |
| Age (years) median 62, range 42-95                                   |                               |
| Relationship to patient                                              |                               |
| <i>Husband</i>                                                       | 4                             |
| <i>Wife</i>                                                          | 1                             |
| <i>Daughter</i>                                                      | 9                             |
| <i>Son</i>                                                           | 6                             |
| <i>Other relative</i>                                                | 4                             |
| <i>Friend</i>                                                        | 1                             |
| Participation in interviews                                          | 25                            |
|                                                                      |                               |
| <b>Staff</b>                                                         |                               |
| Consent to be involved in observation                                | 12                            |

Figure 1, Presents the themes and categories for sharing the journey

## Sharing the journey

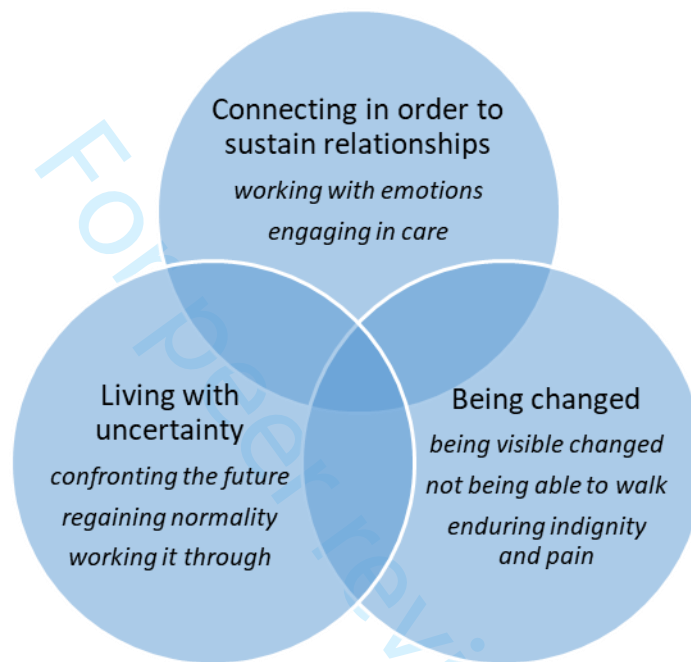

## COREQ (COnsolidated criteria for REporting Qualitative research) Checklist

A checklist of items that should be included in reports of qualitative research. You must report the page number in your manuscript where you consider each of the items listed in this checklist. If you have not included this information, either revise your manuscript accordingly before submitting or note N/A.

| Topic                                          | Item No. | Guide Questions/Description                                                                                                                              | Reported on Page No. |
|------------------------------------------------|----------|----------------------------------------------------------------------------------------------------------------------------------------------------------|----------------------|
| <b>Domain 1: Research team and reflexivity</b> |          |                                                                                                                                                          |                      |
| <i>Personal characteristics</i>                |          |                                                                                                                                                          |                      |
| Interviewer/facilitator                        | 1        | Which author/s conducted the interview or focus group?                                                                                                   |                      |
| Credentials                                    | 2        | What were the researcher's credentials? E.g. PhD, MD                                                                                                     |                      |
| Occupation                                     | 3        | What was their occupation at the time of the study?                                                                                                      |                      |
| Gender                                         | 4        | Was the researcher male or female?                                                                                                                       |                      |
| Experience and training                        | 5        | What experience or training did the researcher have?                                                                                                     |                      |
| <i>Relationship with participants</i>          |          |                                                                                                                                                          |                      |
| Relationship established                       | 6        | Was a relationship established prior to study commencement?                                                                                              |                      |
| Participant knowledge of the interviewer       | 7        | What did the participants know about the researcher? e.g. personal goals, reasons for doing the research                                                 |                      |
| Interviewer characteristics                    | 8        | What characteristics were reported about the interviewer/facilitator? e.g. Bias, assumptions, reasons and interests in the research topic                |                      |
| <b>Domain 2: Study design</b>                  |          |                                                                                                                                                          |                      |
| <i>Theoretical framework</i>                   |          |                                                                                                                                                          |                      |
| Methodological orientation and Theory          | 9        | What methodological orientation was stated to underpin the study? e.g. grounded theory, discourse analysis, ethnography, phenomenology, content analysis |                      |
| <i>Participant selection</i>                   |          |                                                                                                                                                          |                      |
| Sampling                                       | 10       | How were participants selected? e.g. purposive, convenience, consecutive, snowball                                                                       |                      |
| Method of approach                             | 11       | How were participants approached? e.g. face-to-face, telephone, mail, email                                                                              |                      |
| Sample size                                    | 12       | How many participants were in the study?                                                                                                                 |                      |
| Non-participation                              | 13       | How many people refused to participate or dropped out? Reasons?                                                                                          |                      |
| <i>Setting</i>                                 |          |                                                                                                                                                          |                      |
| Setting of data collection                     | 14       | Where was the data collected? e.g. home, clinic, workplace                                                                                               |                      |
| Presence of non-participants                   | 15       | Was anyone else present besides the participants and researchers?                                                                                        |                      |
| Description of sample                          | 16       | What are the important characteristics of the sample? e.g. demographic data, date                                                                        |                      |
| <i>Data collection</i>                         |          |                                                                                                                                                          |                      |
| Interview guide                                | 17       | Were questions, prompts, guides provided by the authors? Was it pilot tested?                                                                            |                      |
| Repeat interviews                              | 18       | Were repeat interviews carried out? If yes, how many?                                                                                                    |                      |
| Audio/visual recording                         | 19       | Did the research use audio or visual recording to collect the data?                                                                                      |                      |
| Field notes                                    | 20       | Were field notes made during and/or after the interview or focus group?                                                                                  |                      |
| Duration                                       | 21       | What was the duration of the interviews or focus group?                                                                                                  |                      |
| Data saturation                                | 22       | Was data saturation discussed?                                                                                                                           |                      |
| Transcripts returned                           | 23       | Were transcripts returned to participants for comment and/or                                                                                             |                      |

| Topic                                  | Item No. | Guide Questions/Description                                                                                                        | Reported on Page No. |
|----------------------------------------|----------|------------------------------------------------------------------------------------------------------------------------------------|----------------------|
|                                        |          | correction?                                                                                                                        |                      |
| <b>Domain 3: analysis and findings</b> |          |                                                                                                                                    |                      |
| <i>Data analysis</i>                   |          |                                                                                                                                    |                      |
| Number of data coders                  | 24       | How many data coders coded the data?                                                                                               |                      |
| Description of the coding tree         | 25       | Did authors provide a description of the coding tree?                                                                              |                      |
| Derivation of themes                   | 26       | Were themes identified in advance or derived from the data?                                                                        |                      |
| Software                               | 27       | What software, if applicable, was used to manage the data?                                                                         |                      |
| Participant checking                   | 28       | Did participants provide feedback on the findings?                                                                                 |                      |
| <i>Reporting</i>                       |          |                                                                                                                                    |                      |
| Quotations presented                   | 29       | Were participant quotations presented to illustrate the themes/findings?<br>Was each quotation identified? e.g. participant number |                      |
| Data and findings consistent           | 30       | Was there consistency between the data presented and the findings?                                                                 |                      |
| Clarity of major themes                | 31       | Were major themes clearly presented in the findings?                                                                               |                      |
| Clarity of minor themes                | 32       | Is there a description of diverse cases or discussion of minor themes?                                                             |                      |

Developed from: Tong A, Sainsbury P, Craig J. Consolidated criteria for reporting qualitative research (COREQ): a 32-item checklist for interviews and focus groups. *International Journal for Quality in Health Care*. 2007. Volume 19, Number 6: pp. 349 – 357

**Once you have completed this checklist, please save a copy and upload it as part of your submission. DO NOT include this checklist as part of the main manuscript document. It must be uploaded as a separate file.**
